# Supplementary material for: Comparison of sequencing methods and data processing pipelines for whole genome sequencing and minority single nucleotide variant (mSNV) analysis during an influenza A/H5N8 outbreak
Source: PubMed Central journal article supplement (PMC7032710; doi:10.1371/journal.pone.0229326), 2020-02-20
Supplement: pone.0229326.s001.pdf [file pone.0229326.s001.pdf]

| Gene segment | Set          | Sense                   | Primer Sequence              |
|--------------|--------------|-------------------------|------------------------------|
| PB2          | 1            | 3-Forward               | CGAAAGCAGGTCAAATATATTC       |
|              |              | 521-Reverse             | TCCATGATGACATCTTGTGCTTC      |
|              | 2            | 428-Forward             | CATGGAACCTTCGGTCCCGTTCA      |
|              |              | 931-Reverse             | ATCCACAGCTTGTTCCTCAGTTGG     |
|              | 3            | 855-Forward             | AGCAACGGTATCAGCGGATCCA       |
|              |              | 1403-Reverse            | CCATGACATTATCAATGGGTTC       |
|              | 4            | 1315-Forward            | CCCATGCATCAACTCCTGAGACA      |
|              |              | 1820-Reverse            | GTTCTCACAAATCCACTGTATTG      |
|              | 5            | 1759-Forward            | GAACCGTTCCAATCCTTGGTACCT     |
|              |              | 2341-Reverse            | AGTAGAAACAAGGTCGTTT          |
| PB1          | 1            | 3-Forward               | RAAAGCAGGCAAACCAAYTTGAATG    |
|              |              | 538-Reverse             | CCATCACATCCTTGAGGAAATC       |
|              | 2            | 445-Forward             | ACYGCTTTGGCCAACACTATAGA      |
|              |              | 944-Reverse             | GTATTGTCYCCATGAATTGTAAAGG    |
|              | 3            | 877-Forward             | GTCCTCAGGAACATGATGACTAACTCAC |
|              |              | 1403-Reverse            | ATCCCTCATGATTCGGTGC          |
|              | 4            | 1319-Forward            | CCAAAACCACATATTGGTGGGACGG    |
|              |              | 1892-Reverse            | CTGCCCTGGTARTCTTCATCCATC     |
|              | 5            | 1782-Forward            | GGCAGGACTGTTGGTTTCAGATGG     |
|              |              | 2326-Reverse            | TTTTTTCAYGAAGGACAAGC         |
| PA           | 1            | 3-Forward               | CRAAAGCAGGTACTGATYC          |
|              |              | 607-Reverse             | CGGATTGACGAAAGGAATCCCA       |
|              | 2            | 452-Forward             | CACACATTCACATATTCTCATTAC     |
|              |              | 897-Reverse             | GCTTAATTTAAGYGCATCCATTAC     |
|              | 3            | 731-Forward             | GAGGGCAAGCTTTCTCAAATGTC      |
|              |              | 1305-Reverse            | TTCATCAAGTTCAATCCAAGTGA      |
|              | 4            | 1168-Forward            | GAGGACTGCAAAGATGTTAGCGA      |
|              |              | 1646-Reverse            | CAGTACTTTTCCCACTTGTGTGG      |
|              | 5            | 1490-Forward            | GCAGAACCAAAGAAGGAAGACGG      |
|              |              | 2072-Reverse            | GATCGAAGGTCCCAGGTTCCAGG      |
| 6            | 1816-Forward | GCCGAGTCTTCTGTCAAAGAGAA |                              |
|              | 2233-Reverse | AGTAGAAACAAGGTACYTTTT   |                              |
| HA           | 1            | 5-Forward               | AAAGCAGGGGTHYDATCTGTC        |
|              |              | 570-Reverse             | TTGTARCTYCTCTTTATBGTBGG      |
|              | 2            | 465-Forward             | GRGTRAGCKCAGCATGTCC          |
|              |              | 917-Reverse             | GDGTTTGRCACTTGGTGTTC         |
|              | 3            | 803-Forward             | AGTAATGGRAATTTTATTGTCYCC     |
|              |              | 1378-Reverse            | ATTYTCCATKAGAACYAGRAGTTC     |
|              | 4            | 1247-Forward            | ACTCARTTTGARGCHGTTGG         |

|    |   |              |                          |
|----|---|--------------|--------------------------|
|    |   | 1789-Reverse | AGTAGAAACAAGGGTGTTTT     |
| NP | 1 | 1-Forward    | AGCRAAAGCAGGGTDKATA      |
|    |   | 482-Reverse  | GCATCATTYAGRRTTKGAATGCC  |
|    | 2 | 239-Forward  | GAATGGTNCTCTCTGCVTTTG    |
|    |   | 838-Reverse  | TGAGTGCAGACCGHGCCAG      |
|    | 3 | 729-Forward  | RAAATTYCAAACAGCAGCAC     |
|    |   | 1266-Reverse | CTKATYTYGCCTGCVGATGC     |
|    | 4 | 1132-Forward | GTTCAAATTGCTTCAAATG      |
|    |   | 1565-Reverse | AGTAGAAACAAGGGTATTTT     |
| NA | 1 | 3-Forward    | CRAAAGCAGGAGTTYAAAATG    |
|    |   | 531-Reverse  | GGCTTGATATACATTGGGTGATTG |
|    | 2 | 400-Forward  | TGCAGGACTTTCTTCCTCACTCA  |
|    |   | 900-Reverse  | GTTGTCTCTACACACGCATTCCAC |
|    | 3 | 731-Forward  | ATTGGGTAATGACTGACGGTCC   |
|    |   | 1237-Reverse | AAGACCCACTGTATCCCGACCA   |
|    | 4 | 1103-Forward | GGACAATTAGTCGAACCTCCAGA  |
|    |   | 1460-Reverse | AGTAGAAACAAGGAGTTTTT     |
| MA | 1 | 5-Forward    | AAAGCAGKTAGATRTTGAAARATG |
|    |   | 564-Reverse  | ACCATTCTGTTYTCATGYCTG    |
|    | 2 | 461-Forward  | TAKTRTGTGCCACTTGTGAGC    |
|    |   | 1023-Reverse | AGTAGAAACAAGGTARKTTTT    |
| NS | 1 | 3-Forward    | CRAAAGCAGGGTGACAAAVAC    |
|    |   | 547-Reverse  | CCAATTGCAWYTTTGACATCCTC  |
|    | 2 | 453-Forward  | AGAGCTTTCACRGAAGAAGGAGCA |
|    |   | 888-Reverse  | AGTAGAAMCAAGGGTGTTTT     |
