# Supplementary material for: Comparison of sequencing methods and data processing pipelines for whole genome sequencing and minority single nucleotide variant (mSNV) analysis during an influenza A/H5N8 outbreak
Source: PubMed Central journal article supplement (PMC7032710; doi:10.1371/journal.pone.0229326), 2020-02-20
Supplement: pone.0229326.s002.pdf [file pone.0229326.s002.pdf]

| Virus | Segment | Covering positions from start codon ATG | Consensus sequence                                                                                                                                                                                                                                                                                                                                                                                                                                                                                                                                                                                                                                                                                                                                                                                                                                                                                                                                                                                                                                                                                                                                                                                                                                                                                                                                                                                                                                                                                                                                                                                                                                                                                                                                                                                                                                                                                                                                                                                                                                                                                                                                                                                                                                                                                                                                                                                                                                                                                                                                                                                                                                  |
|-------|---------|-----------------------------------------|-----------------------------------------------------------------------------------------------------------------------------------------------------------------------------------------------------------------------------------------------------------------------------------------------------------------------------------------------------------------------------------------------------------------------------------------------------------------------------------------------------------------------------------------------------------------------------------------------------------------------------------------------------------------------------------------------------------------------------------------------------------------------------------------------------------------------------------------------------------------------------------------------------------------------------------------------------------------------------------------------------------------------------------------------------------------------------------------------------------------------------------------------------------------------------------------------------------------------------------------------------------------------------------------------------------------------------------------------------------------------------------------------------------------------------------------------------------------------------------------------------------------------------------------------------------------------------------------------------------------------------------------------------------------------------------------------------------------------------------------------------------------------------------------------------------------------------------------------------------------------------------------------------------------------------------------------------------------------------------------------------------------------------------------------------------------------------------------------------------------------------------------------------------------------------------------------------------------------------------------------------------------------------------------------------------------------------------------------------------------------------------------------------------------------------------------------------------------------------------------------------------------------------------------------------------------------------------------------------------------------------------------------------|
| NLCH  | PB2     | 1-2280                                  | <p><b>ATGGAGAGAATAAAAAGAACTAAGAGATCTAATGTCTCAATCCC</b><br/> <b>GC</b><br/> ACTCGCGAGATACTAACAAAAACCCTGTGGACCATATGGCCATA<br/> ATCAAGAAATACACATCAGGAAGACAAGAGAAGAACCCTGCTCTC<br/> AGAATGAAATGGATGATGGCAATGAAATATCCAATCACAGCAGAC<br/> AAGAGAATAATGGAAATGATTCCTGAAAAGAAATGAACAAGGCCA<br/> GACGCTTTGGAGCAAGACAAATGATGCTGGATCAGACAGAGTGAT<br/> GGTGTCTCCCCTAGCTGTAACCTTGGTGGAATAGAAATGGACCGAC<br/> AGCAAGTACAGTCCATTATCCAAAGGTCTACAAAACATACTTTGA<br/> GAAGGTTGAAAGGTTAAAGCATGGAACCTTCGGTCCCCTTCACTTC<br/> CGAAACCAAATTAATAACGCGCCGAGTTGACATAAACCCAGGC<br/> CACGCAGATCTCAGTGCCAAAGAAGCACAAAGATGTCATCATGGAG<br/> GTCGTTTTCCCAAATGAAGTGGGAGCTAGAATATTGACATCAGAG<br/> TCACAATTGACAATAACGAAAAGAGAAAAAGAAGAACTCCAGGA<br/> TTGCAAGATTGCTCCTTTAATGGTGGCATACATGTTGAAAGAGAA<br/> CTGGTCCGCAAACCAGATTCTACCAGTAGCAGGTGGGACAAGC<br/> AGTGTGTACATTGAGGTAAGTGCACCTGACCCAAGGGACCTGCTGG<br/> GAACAGATGTACACTCCAGGCGGAGAAAGTGAGAAATGACGATGTT<br/> GACCAGAGTTTGATCATCGCGGCCAGAAACATTGTTAGGAGAGCA<br/> ACGGTATCAGCGGATCCACTGGCATCATTATTGGAGATGTGCCAC<br/> AGCACACAAATTGGTGGGACAAGGATGGTGGATATCCTTAGGCAA<br/> AATCCAAGTGAAGCAAGCTGTGGATATATGCAAAGCAGCAATG<br/> GGTTAAGGATTAGTTCATCCTTTAGCTTTGGAGGATCACCTTCA<br/> AAAGAACTAGTGGTTCATCCATTAGAAAGGAAGAGGAAGTGCTTA<br/> CAGGCAACCTCAAACATTGAAAATAAGAGTACATGAGGGGTAT<br/> GAGGAGTTCACAATGGTTGGGCGAAGAGCAACAGCCATTCTAAGG<br/> AAAGCAACTAGAAGGCTGATTCAGTTGATAGTAAGTGGAAGAGAC<br/> GAACAATCAATCGCTGAAGCAATCATCGTAGCCATGGTGTCTCAC<br/> AGGAGGATTGCATGATAAAGGCAGTCCGAGGCGATCTAAATTTT<br/> GTGAACAGAGCAAACCAAAGATTGAACCCCATGCATCAACTCCTG<br/> AGACACTTCCAAAAAGATGCAAAGGTGCTGTTTCAAATTTGGGGG<br/> ATCGAACCATTGATAATGTCATGGGGATGATTGGAATATTGCCTG<br/> ACATGACTCCAAGCACAGAGATGTCACTAAGAGGAGTAAGAGTT<br/> AGTAAAATGGGAGTAGATGAATATTCCAGCACTGAGAGAGTGGTT<br/> GTAAGCATTGACCGTTTCTTGCGGGTTGAGATCAGCAGGGGAAC<br/> GTACTCCTATCTCCGAAGAAGTCAGCGAAACACTGGGAACAGAA<br/> AAATTAACAATAACATATTATCATCAATGATGTGGGAAATCAAT<br/> AATTGGGAGATTGTGAAGATTCAATGGTCTCAAGACCCACGATG<br/> CTGTACAATAAGGTGGAGTTTGAACCGTTCCAATCCTTGGTACCTA<br/> AAGCTGCCAGAGGCCAATACAGTGGATTTGTGAGAACACTGTTT<br/> CAACAAATGCGTGACGTATTGGGGACATTTGATACTATTGAGATA<br/> ATAAAGCTGTTACCGTTTGCAGCAGCCCCACCGGAGCATAGCAGA<br/> ATGCAATTTTCTTCCCTGACCGTGAATGTAAGGGGCTCGGGAATGA<br/> GAATACTCGTAAGGGGTAACCTCCCCTGTGTTCAACTACAATAAG<br/> GCAACCAAAGGGCTTGCCGTCCTTGGAAAGGACGCAGGTGCATTA<br/> ACAGAGGATCCAGATGAGGGGACAACAGGAGTGGAAATCTGCAGT<br/> GCTGAGGGGGTTCCTAATTCTGGGCAGGGAGGACAGAAGATATGG<br/> ACCAGCACTAAGCATCAATGAACTGAGCAATCTTGCGAAAGGGGA<br/> GAAAGCCAATGTGCTGATAGGGCAAGGAGACGTGGTGTCTGTAAT<br/> GAAACGGAAACGGGACTCTAGCATACTTACTGACAGCCAGACAGC<br/> GACCAAAGAATTCCGGATGGTCATCAATTAG</p> |
| NLCH  | PB1     | 1-2277                                  | <p><b>ATGGATGTCAACCCGACTCTACTCTTCTTGAAGTGCCAGCGCAA</b></p>                                                                                                                                                                                                                                                                                                                                                                                                                                                                                                                                                                                                                                                                                                                                                                                                                                                                                                                                                                                                                                                                                                                                                                                                                                                                                                                                                                                                                                                                                                                                                                                                                                                                                                                                                                                                                                                                                                                                                                                                                                                                                                                                                                                                                                                                                                                                                                                                                                                                                                                                                                                          |

|      |    |         |                                                                                                                                                                                                                                                                                                                                                                                                                                                                                                                                                                                                                                                                                                                                                                                                                                                                                                                                                                                                                                                                                                                                                                                                                                                                                                                                                                                                                                                                                                                                                                                                                                                                                                                                                                                                                                                                                                                                                                                                                                                                                                                                                                                                                                                                                                                                                                                                                                                                                                                                                                                                                               |
|------|----|---------|-------------------------------------------------------------------------------------------------------------------------------------------------------------------------------------------------------------------------------------------------------------------------------------------------------------------------------------------------------------------------------------------------------------------------------------------------------------------------------------------------------------------------------------------------------------------------------------------------------------------------------------------------------------------------------------------------------------------------------------------------------------------------------------------------------------------------------------------------------------------------------------------------------------------------------------------------------------------------------------------------------------------------------------------------------------------------------------------------------------------------------------------------------------------------------------------------------------------------------------------------------------------------------------------------------------------------------------------------------------------------------------------------------------------------------------------------------------------------------------------------------------------------------------------------------------------------------------------------------------------------------------------------------------------------------------------------------------------------------------------------------------------------------------------------------------------------------------------------------------------------------------------------------------------------------------------------------------------------------------------------------------------------------------------------------------------------------------------------------------------------------------------------------------------------------------------------------------------------------------------------------------------------------------------------------------------------------------------------------------------------------------------------------------------------------------------------------------------------------------------------------------------------------------------------------------------------------------------------------------------------------|
|      |    |         | <p>AATGCTATAAGTACCACATTCCCCTATACTGGAGATCCTCCATACA<br/> GCCATGGAACAGGAACAGGATACACCATGGACACAGTCAACAGA<br/> ACGCATCAATACTCAGAAAAGGGAAAGTGGACAAAAAACACCGA<br/> GACTGGAGCACCCCAACTCAACCAATTGATGGACCATTACCTGA<br/> GGATAACGAGCCAAGCGGATATGCACAAACGGATTGTGTGTTGGA<br/> AGCAATGGCTTTCCTTGAAGAGTCCCACCCAGGGATCTTTGAAAAC<br/> TCATGTCTTGAAACAATGGAAATTGTTCAACAAACAAGAGTGGAC<br/> AAACTGACCCAAGGTCGTGACACCTATGACTGGACATTGAATAGA<br/> AACCAGCCGGCTGCAACTGCTTTAGCCAACACTATAGAAGTCTTCA<br/> GATCGAACGGTCTAACAGCCAATGAGTCAGGGGAGACTGATAGATT<br/> TCCTCAAAGATGTGATGGAGTCAATGGACAAAGAAGAAATGGAA<br/> ATAACAACACATTTCCAAAGAAAGAGAAGAGTAAGAGACAATAT<br/> GACCAAGAAAATGGTCACACAAAGAACAATAGGGGAAGAAAAAC<br/> AGAGACTGAACAAGAAGAAGTACTTGGTAAGGGCACTGACTGGA<br/> ACACAATGACAAAAGATGCAGAAAAGAGGCAAGTTGAAGAGGCGG<br/> GCAATTGCAACACCCGGGATGCAATCAGAGGGTTCGTGACTTT<br/> GTCGAAACATTAGCGAGGAGCATCTGCGAGAAACTTGAGCAACT<br/> GGGCTCCCTGTTGGAGGAAATGAAAAAAGGCTAAGTTGGCAAAT<br/> GTCGTGAGAAAGATGATGACTAACTACAAGACACAGAGCTATCC<br/> TTTACAATTACTGGAGACAATACCAAGTGGAACGAGAATCAGAAT<br/> CCTCGGATTTTTTTGGCAATGATAACATATATCACAAGAAATCAAC<br/> CTGAGTGGTTTAGAAATGTGTTAAGTATTGCCCTATAATGTTCTC<br/> AAACAAAATGGCAAGTTAGGGAAAGGATACATGTTGAAAGTA<br/> AGAGCATGAAGCTACGGACACAAATACCAGCAGAAATGCTTGCAA<br/> CCATTGACCTGAAATATTTCAACGAATCGACAAGAAAGAAAATTG<br/> AGAAAATAAGGCCTCTCCTAATAGAAGGGACAGCCTCGTTGAGTC<br/> CTGGAATGATGATGGGCATGTTCAACATGCTGAGTACAGTCTTGG<br/> GAGTATCAATTCTAAATCTTGGCCAAAAGAGGTACACCAAACCA<br/> CATACTGGTGGGACGGACTCCAATCCTCTGATGATTTGCTCTCAT<br/> AGTAAATGCACCGAATCATGAGGGAATACAGGCAGGAGTGGACA<br/> GGTTCTATAGGACTTGTAATTTGGTTGGGATCAATATGAGTAAAA<br/> AGAAATCCTATATAAATCGGACAGGAACATTTGAATTCACAAGCT<br/> TTTTCTACCGTTATGGGTTTGTAGCCAACCTTCAGCATGGAGCTGCC<br/> CAGCTTTGGAGTTTCTGGGATCAATGAATCGGCTGACATGAGCATT<br/> GGAGTTACAGTAATAAAGAATAACATGATAAACAACGATCTTGGA<br/> CCAGCAACAGCTCAATGGCTCTTCAGCTATTTATCAAGGACTACA<br/> GATATACATATCGATGCCACAGGGGTGATACACAAATACAAACAA<br/> GGAGATCATTCGAGCTAAAGAAGCTGTGGGAGCAGACCCGTTCAA<br/> AGGCAGGACTGTTGGTTTCAGATGGAGGCCAAAACCTTATACAATA<br/> TACGGAATCTCCACATCCCAGAGGTCTGCTTGAAGTGGGAACCTGA<br/> TGGATGAAGATTACCAGGGTAGACTTTGTAATCCCCTGAACCCCTT<br/> TGTCAGTCATAAGGAAATTGAATCCGTAACAATGCTGTAGTGAT<br/> GCCAGCCCATGGTCCGGCCAAAAGCATGGAATATGATGCTGTTGC<br/> GACCACACACTCATGGGTCCCTAAGAGGAACCGTTCCATTCTGAAT<br/> ACCAGTCAAAGAGGAATCCTTGAGGATGAACAGATGTATCAGAAG<br/> TGCTGCAATCTATTTGAAAAATTCTTCCCTAGTAGCTCATAACAGGA<br/> GGCCAGTTGGAATCTCCAGTATGGTGGAGGCCATGGTGTCTAGGG<br/> CCCGAATTGATGCACGGATTGACTTCGAGTCTGGTAGGATTAAGA<br/> AGGAAGAGTTTGCTGAGATCATGAAGATCTGTTCCACCATTGAAG<br/> AGATCAGACGGCAAAAACAGTGA</p> |
| NLCH | PA | -6-2190 | <p>TCCAAAATGGAAGACTTTGTGCGACAATGCTTCAATCCAATGATC<br/> ATCGAGCTTGGCGAAAAGACAATGAAAGAATATGGGGAAAATCC<br/> AAAATCGAAACGAACAAATTCGCTGCAATATGCACTCACTTAGA<br/> GGTCTGTTTCATGTATTCCGATTTCCACTTTATTGATGAACGTGGT<br/> AAATCAATAATTGTAGAATCTGGCGATCCGAATGCATTATTGAAA<br/> CACCGATTTGAGATAATTGAAGGGAGGGACCGAACGATGGCTTGG</p>                                                                                                                                                                                                                                                                                                                                                                                                                                                                                                                                                                                                                                                                                                                                                                                                                                                                                                                                                                                                                                                                                                                                                                                                                                                                                                                                                                                                                                                                                                                                                                                                                                                                                                                                                                                                                                                                                                                                                                                                                                                                                                                                                                                                                                                                                                            |

|      |    |        |                                                                                                                                                                                                                                                                                                                                                                                                                                                                                                                                                                                                                                                                                                                                                                                                                                                                                                                                                                                                                                                                                                                                                                                                                                                                                                                                                                                                                                                                                                                                                                                                                                                                                                                                                                                                                                                                                                                                                                                                                                                                                                                                                                                                                                                               |
|------|----|--------|---------------------------------------------------------------------------------------------------------------------------------------------------------------------------------------------------------------------------------------------------------------------------------------------------------------------------------------------------------------------------------------------------------------------------------------------------------------------------------------------------------------------------------------------------------------------------------------------------------------------------------------------------------------------------------------------------------------------------------------------------------------------------------------------------------------------------------------------------------------------------------------------------------------------------------------------------------------------------------------------------------------------------------------------------------------------------------------------------------------------------------------------------------------------------------------------------------------------------------------------------------------------------------------------------------------------------------------------------------------------------------------------------------------------------------------------------------------------------------------------------------------------------------------------------------------------------------------------------------------------------------------------------------------------------------------------------------------------------------------------------------------------------------------------------------------------------------------------------------------------------------------------------------------------------------------------------------------------------------------------------------------------------------------------------------------------------------------------------------------------------------------------------------------------------------------------------------------------------------------------------------------|
|      |    |        | <p>ACAGTGGTAAATAGTATCTGCAACACCACAGGAGTCGATAAGCCT<br/> AAATTCCTCCCAGATTTGTATGATTACAAGGAGAACCGATTTCATT<br/> GAAATTGGAGTGACAAGGAGGGAAGTTCACACATACTACCTAGAA<br/> AAGGCAAATAAGATAAAATCAGAGAAGACACACATTCACATATTC<br/> TCATTCCTGGGGAGGAGATGGCCACCAAAGCTGATTATATCCTTG<br/> ATGAAGAGAGCAGGGCAAGGATCAAACCAGGTTGTTCACTATC<br/> AGGCAAGAAATGGCCAATAGGGGTCTGTGGGATTCTTTTCGTCAA<br/> TCTGAGAGAGGGCGAAGAGACAATTGAAGAAAGTTTGAATCACA<br/> GGAACCATGCGCAGGCTTGCCGACCAAAGTCTCCCACCGAATTTCT<br/> CCAGCCTTGAAAATTTAGAGCCTATGTGGATGGATTCAAACCG<br/> AACGGCTGCCTTGAGGGCAAGCTTTCTCAAATGTCAAAGAAGTG<br/> AACGCCAGAATTGAGCCATTCATGAAGAAAACACCACGCCCTCTC<br/> AGATTACCTGATGGTCTCTCTGCTCTCAGCGGTCGAAATCTTAC<br/> TGATGGATGCTCTTAAATTGAGCATCGAAGACCCAAGCCATGAG<br/> GGAGAAGGTATACCGCTATATGATGCAATCAAATGCATGAAGACG<br/> TTTTTTGGTTGGAAAGAGCCCAACATTGTAACCACATGTAAAA<br/> GCATAAATCCCAACTATCTCTGGCTTGAAGCAGGTGCTGGTAG<br/> AACTCCAAGACATTGAAAATGAAGAGAAAATCCCAAAAACAAAA<br/> AACATGAAGAAAACAAGCCAACTAAAATGGGCACTCGGTGAGAA<br/> TATGGCACCTGAAAAAGTGGACTTTGAGGACTGCAAAGATGTTAG<br/> CGATCTAAGACAGTATGACAGTGATGAACCAGAGCCCAGATCATT<br/> ATCAAGCTGGATCCAGAGCGAATTCACAAAGCATGCGAATTGAC<br/> AGATTCGAGTTGGATTGAACTTGATGAAATAGGAGAAGATGTTGC<br/> TCCAATTGAGCACATTGCGAGTATGAGAAGAACTACTTCACAGC<br/> GGAAGTGTCTCATTGCAGGGCTACTGAATATATAATGAAAGGAGT<br/> TTATATAAATACAGCCCTGTTGAATTCATCCTGTGCAGCCATGGAT<br/> GACTTCCAATTGATTCCAATGATAAGCAAGTGCAGAACCAAAGAA<br/> GGAAGACGGAAGACAAATCTATATGGGTTTCATTATAAAAGGAAGA<br/> TCCCATTTGAGGAATGATACCGATGTGGTAAATTTTGTGAGCATGG<br/> AGTTCTCTTACTGACCCGAGGCTGGAACCACACAAGTGGGAA<br/> AAGTACTGTGTTCTCGAAATAGGAGACATGCTCCTACGAACTGCA<br/> ATAGGCCAAGTATCAAGACCCATGTTTCTTTATGTAAGGACCAATG<br/> GGACTTCCAAGATCAAGATGAAAATGGGGCATGGAGATGAGGCGAT<br/> GCCTTCTTCAATCCCTCCAACAAATTGAGAGCATGATTGAGGCA<br/> GAGTCTTCTGTCAAAGAGAAGGACATGACCAAGGAATCTTTGAA<br/> AATAAATCAGAAACGTGGCCAATTGGGGAATCACCTAAGGGGGTG<br/> GAGGAAAGCTCTATTGGGAAAGTGTGTAGAACATTACTAGCAAAA<br/> TCTGTATTCAACAGCCTATATGCATCTCCACAACCTTGAGGGGTTT<br/> TCAGCTGAGTCGAGAAAGTTACTTCTCATTGTTTCAGGCATTTAGGG<br/> ACAACCTGGAACCTGGGACCTTCGATCTTGGGGGGCTATATGAAG<br/> CAATTGAGGAGTGCCTGATTAATGATCCCTGGGTTTTGCTTAATGC<br/> ATCTTGGTTCAACTCCTTCTTACACATGCACCTGAAATAGTTG<br/> TGGCAATGCTACTATTTGCTATCCATACTGTCCAAA</p> |
| NLCH | HA | 7-1704 | <p>AAAATAGTGCTTCTTCTTGCAGTGGTTAGCCTTGTTAAAAGTGATC<br/> AGATTTGCATTGGTTACCATGCAAACAACCTCAACAAAACAGGTTG<br/> ACACAATAATGGAAAAAAACGTCCTGTTACACATGCCCAAGACA<br/> TACTGGAAAAGACACACAACGGGAAGCTCTGCGATCTTAATGGA<br/> GTGAAGCCCCTGATTCTAAAGGATTGTAGCGTAGCTGGGTGGCTCC<br/> TTGGAAATCCAATGTGCGACGAGTTCATCAGGGTGCCGGAATGGT<br/> CTTACATCGTGGAGAGGGCTAACCAGCCAACGACCTCTGTTACCC<br/> AGGGACCCTCAATGACTATGAGGAACTGAAACACCTACTGAGC<br/> AGAATAAATCATTTTTGAGAAAACCTCTGATCATCCCAAGAGTTCTT<br/> GGCCAATCATGAAACATCATTAGGGGTGAGCGCAGCATGTCCAT<br/> ACCAGGGAGCATCCTCATTTTTTCAGAAATGTGGTATGGCTCATCAA<br/> AAAGAACGATGCATACCCGACAATAAAGATAAGCTACAATAAT<br/> ACCAATCGGGAAGATCTTTTGATACTGTGGGGATTTCATCATCCCA</p>                                                                                                                                                                                                                                                                                                                                                                                                                                                                                                                                                                                                                                                                                                                                                                                                                                                                                                                                                                                                                                                                                                                                                                                                                                                                                                                                                                                                                                                                                                                                                                     |

|      |    |        |                                                                                                                                                                                                                                                                                                                                                                                                                                                                                                                                                                                                                                                                                                                                                                                                                                                                                                                                                                                                                                                                                                                                                                                                                                                                                                                                                                                                                                                                                                                                                                                                                                                         |
|------|----|--------|---------------------------------------------------------------------------------------------------------------------------------------------------------------------------------------------------------------------------------------------------------------------------------------------------------------------------------------------------------------------------------------------------------------------------------------------------------------------------------------------------------------------------------------------------------------------------------------------------------------------------------------------------------------------------------------------------------------------------------------------------------------------------------------------------------------------------------------------------------------------------------------------------------------------------------------------------------------------------------------------------------------------------------------------------------------------------------------------------------------------------------------------------------------------------------------------------------------------------------------------------------------------------------------------------------------------------------------------------------------------------------------------------------------------------------------------------------------------------------------------------------------------------------------------------------------------------------------------------------------------------------------------------------|
|      |    |        | <p>ACAATGCAGAAGAGCAGACAAATCTCTATAAAAACCCAGACACTT<br/> ATGTTTCCGTTGGGACATCAACATTAACCCAGAGATTGGTGCCAA<br/> AAATAGCTACTAGATCCCAAGTAAACGGGCAACGTGGAAGAATG<br/> GATTTCTTCTGGACAATTTTAAAACCGAATGATGCAATCCACTTTG<br/> AGAGTAATGGAATTTTCATTGCTCCAGAATATGCCTACAAAATTGT<br/> CAAGAAAGGGGACTCAACAATTATGAAAAGTGAAGTGGAGTATG<br/> GCCACTGCAACACCAAATGTCAAACCCCAATAGGGGCGATAAAC<br/> TCTAGCATGCCATTCCACAATATACACCCTCTCACCATCGGGGAAT<br/> GCCCCAAATACGTGAAGTCAAACAAATTAGTCCTTGGGACTGGGC<br/> TCAGAAATAGTCCTCTAAGGGAAAAGAAGAAGAAAAGAGGACTA<br/> TTTGGAGCTATAGCAGGGTTTATAGAGGGAGGATGGCAGGGGAATG<br/> GTAGACGGTTGGTATGGGTACCACCATAGCAATGAGCAGGGGAGT<br/> GGGTACGCTGCAGACAAAGAATCCACCCAAAAGGCAGTAGATGG<br/> AGTTACCAATAAGGTCAACTCAATCATTGACAAAATGAACACTCA<br/> ATTTGAGGCCGTTGGAAGGGAATTAATAATTTAGAAAAGGAGAAT<br/> AGAGAATCTAAACAAGAAAATGGAAGACGGATTCTAGATGTCTG<br/> GACTTATAATGCTGAACTTTTAGTTCTCATGGAAAATGAGAGAACT<br/> CTAGATTTCCATGACTCAAATGTCAAGAACCTTTACGACAAAGTCC<br/> GACTACAGCTTAGGGATAATGCAAAGGAGCTGGGTAATGGTTGT<br/> TTCGAGTTCTATCACAATGTGATAACGAATGTATGGGAAGCGTA<br/> AGAAATGGGACGTATGACTACCCTAAGTATTCAGAAGAAGCAAGG<br/> TTAAAAGAGAAGAAATAAGCGGAGTGAAATTAGAATCAATAGG<br/> AACTTACCAATACTGTCAATTTATTCAACAGTGGCGAGTTCCTA<br/> GCACTGGCAATCATAGTGGCTGGTCTATCTTTATGGATGTGCTCTA<br/> ATGGGTGCTACAATGCAGAATTTGCATCTAA</p>                                                                                                                                                                                                                                                                                                                                              |
| NLCH | NP | 1-1497 | <p><b>ATGGCGTCTCAAGGCACCAAACGATCTTATGAACAGATGGAAACT</b><br/> GGTGGAGAACGCCAGAATGCCACTGAAATCAGAGCATCTGTTGGA<br/> AGAATGGTTGGTGGAAATTGGAAGGTTTTATATACAGATGTGCACT<br/> GAACTCAAACCTCAGCAATTATGAGGGGAGACTGATCCAGAACAGC<br/> ATAACAATAGAAAGAATGGTTCTCTCTGCATTTGATGAAAGGAGG<br/> ACAAGTACCTGGAAGAACATCCCAGTGCGGGGAAGGACCCAAA<br/> GAAAACCTGGAGGTCCAATCTACAGAAGAAGAGACGGAAAGTGGGA<br/> TGAGGGAGCTGATTCTGTATGACAAAGAAGAGATCAGAAGGATCT<br/> GGCGTCAAGCAAATAATGGAGAAGATGCAACTGCTGGTCTCACCC<br/> ATCTGATGATCTGGCACTCCAACCTGAATGATGCCACATATCAGAG<br/> GACAAGGGCTCTCGTGCGCACTGGAATGGATCCCAGAATGTGCTC<br/> TCTGATGCAAGGATCAACTCTCCAAGAAGGTCTGGAGCTGCTGG<br/> TGCAGCAGTAAAAGGGGTGCGAACAATGGTAATGGAATTGATTGCG<br/> AATGATAAAGCGAGGGATTAATGATCGGAATTTCTGGAGAGGCGA<br/> AAATGGAAGAAGGACAAGGATTGCCTATGAGAGAATGTGCAACAT<br/> CCTCAAAGGGAAATTTCAAACAGCAGCAAAAGAGCAATGATGGA<br/> TCAAGTGCAGAAAAGCAGGAATCCTGGGAATGCTGAAATTGAAGA<br/> TCTCATTTTTCTGGCACGGTCTGCACTCATCCTGAGAGGATCAGTG<br/> GCCACAAGTCTTGTCTGCCTGCTTGTGTTTACGGACTTGCTGTGG<br/> CCAGTGGATATGACTTTGAGAGAGAAGGATACTCTCTGGTTGGA<br/> ATAGACCCTTTCCGTCTGCTTCAAACAGCCAGGCTTTCAGTCTCA<br/> TTAGACCAAATGAAAACCCAGCACATAAAAAGTCAGTTGGTATGGA<br/> TGGCATGCCATTCAGCAGCGTTTGGAGACCTGAGAGTATCAAGTTT<br/> CATCAGAGGGACAAGAGTGGTCCCAAGAGGACAACCTATCCACCAG<br/> AGGAGTTCAAATTGCATCAAATGAAAACATGGAAACAATGGACTC<br/> CAGCACTCTTGAATTGAGAAGCAGATACTGGGCTATAAGAACCAG<br/> GAGTGGAGGAAACACCAACCAACAGAGAGCTTCTGCAGGACAAA<br/> TCAGCGTACAACCCACCTTCTCAGTACAGAGAAATCTTCCCTTT<br/> GAAAGAACGACCATCATGGCGGCATTTACAGGGAACACTGAAGGC<br/> AGGACCTCTGACATGAGGACTGAGATCATAAGAATGATGGAAAGT<br/> GCCAAACCAGAAGATGTGTCCTTCCAGGGGCGGGGAGTCTTCGAG</p> |

|      |    |        |                                                                                                                                                                                                                                                                                                                                                                                                                                                                                                                                                                                                                                                                                                                                                                                                                                                                                                                                                                                                                                                                                                                                                                                                                                                                                                                                                                                                                                                                                                                                                                                                     |
|------|----|--------|-----------------------------------------------------------------------------------------------------------------------------------------------------------------------------------------------------------------------------------------------------------------------------------------------------------------------------------------------------------------------------------------------------------------------------------------------------------------------------------------------------------------------------------------------------------------------------------------------------------------------------------------------------------------------------------------------------------------------------------------------------------------------------------------------------------------------------------------------------------------------------------------------------------------------------------------------------------------------------------------------------------------------------------------------------------------------------------------------------------------------------------------------------------------------------------------------------------------------------------------------------------------------------------------------------------------------------------------------------------------------------------------------------------------------------------------------------------------------------------------------------------------------------------------------------------------------------------------------------|
|      |    |        | CTCTCGGACGAAAAGGCAACGAACCCGATCGTGCCTTCCTTTGAC<br>ATGAGCAACGAAGGATCTTATTTCTTCGGAGACAGTGCAGAGGAG<br>TATGACAATTAA                                                                                                                                                                                                                                                                                                                                                                                                                                                                                                                                                                                                                                                                                                                                                                                                                                                                                                                                                                                                                                                                                                                                                                                                                                                                                                                                                                                                                                                                                      |
| NLCH | NA | 4-1419 | AATCCAAATCAGAAAATAGTAACCATTGGCTCCATTTTCATTAGGGT<br>TGGTTGATTCAATGTTCTACTGCATGCTGTGAGCATCATATTAAC<br>AGTGTTAGCCCTGGGGAAGAGTGAAAACAATGGAATCTGCAATGG<br>AACTGTAGTGAGAGAATACAATGAAACAGTTAGAATAGAGAAA<br>GTGACTCAATGGTACAATACTAGCGTAGTTCGAATATGTACCGCATT<br>GGAATGAGGGCACTTATATAAATAACACCGAACCAATATGTGATG<br>TCAAGGGCTTTGCACCTTTTTCCAAGGACAACGGGATAAGAGTTG<br>GCTCCAGGGGACATATTTTTGTCATAAGAGAGCCTTTCGTCTCT<br>TGTTACCTGTAGAGTGCAGGACTTTCTTCTCACTCAGGGATCTC<br>TACTCAATGACAAACACTCAAATGGAACAATGAAGGATAGAAGCC<br>CATTCAGAACTCTCATGAGTGTGCAAGTGGGCCAATCACCCAATGT<br>ATATCAAGCCAGGTTTGAAGCTGTGGCATGGTCAGCAACAGCC<br>TGTCATGATGGTAAGAAGTGGATGACGATTGGTGTAAACAGGGCCA<br>GATTCTAAAGCAGTAGCAGTAGTTCATTACGGAGGGTGCCTACT<br>GACGTTGTTAACTCCTGGGCAGGAGATATATTAAGAAGCTCAGGAG<br>TCATCTTGTACTTGCATTCAAGGTAATTGTTATTGGGTAATGACT<br>GACGGTCTGCCAATAGACAGGCGCAGTATAGAATATACAAAGCA<br>AATCAAGCCAAAATAATTGGCCGAACAGATGTTAGCTTTAGTGGA<br>GGACATATTGAGGAATGTTCTTGTTATCCAAATGATGGTAAAGTGG<br>AATGCGTGTGTAGAGACAACCTGGACGGGAACTAACAGGCCTGTA<br>CTAATTATTTTCGCCTGATCTCTCTTACAGGGTTGGGTATTTATGTG<br>AGGGTTGCCAGTGACACTCCAAGAGGGGAAGATACTCAATTTGT<br>CGGTTTCATGCACTAGTCCCATGGGAAATCAGGGATATGGCGTAAA<br>AGGGTTTCGGGTTTCGACAGGGAACCTGATGTGTGGGTGGGGCGG<br>ACAATTAGTCGAACCTCCAGATCAGGATTTGAAATAATAAGGATA<br>AAGAATGGTTGGACGCAAACAAGCAAAGAACAGATTAGAAGACA<br>GGTGGTTGTTGATAACTCGAATTGGTTCGGGATACAGTGGGTCTTTC<br>ACTTACCAGTAGAATTGCTGGGAGGGAATGTTGGTTCCTGT<br>TTTTGGTTCGAAATGATCAGAGGTAGGCCAGAAGAGAGAACAATC<br>TGGACCTCTAGTAGCTCCATTGTAATGTGTGGAGTTGATTATGAAA<br>TTGCCGATTGGTCATGGCACGATGGAGCTATTCTTCCCTTTGACAT<br>CGATAAGACGTAATTTACG |
| NLCH | MP | -5-982 | GAAAGATGAGTCTTCTAACCGAGGTGCAAACGTACGTTCTCTCTAT<br>CATCCCGTCAGGCCCCCTCAAAGCCGAGATCGCGCAGAGACTTGA<br>AGATGTCTTTGCAGGGAAAACACCGATCTCGAGGCTCTCATGGA<br>GTGGCTAAAGACAAGACCAATCCTGTACCTCTGACTAAAGGGA<br>TTTTGGGATTTGTGTTACGCTCACCGTGCCAGTGAGCGAGGACT<br>GCAGCGTAGACGCTTCGTCCAGAATGCCCTAAATGGAAACGGGGA<br>TCCAAATAATATGGATAAGGCAGTTAAGCTATATAAGAAGCTGAA<br>AAGAGAGATAACATTCCATGGGGCTAAGGAGGTCGCACTTAGCT<br>ACTCAACCGGTGCACTTGCCAGCTGCATGGGTCTCATATACAACAG<br>GATGGGAACGGTGACTACAGAAGTGGCTTTTGGCCTAGTGTGTGC<br>CACTTGTGAGCAGATTGCAGATTCACAGCATCGGTCCACAGACA<br>GATGGCAACCATCACCAACCCATTAATCAGACATGAGAACAGAA<br>TGGTGCTGGCCAGCACTACAGCTAAGGCCATGGAGCAGATGGCAG<br>GATCAAGCGAGCAGGCATCAGAAGCCATGGAGGTTGCTAATCAGG<br>CCAGGCAGATGGTACAGGCAATGAGGACAATTGGGACTCATCCTA<br>ACTCTAGTGCTGGTCTGAGAGATAATCTTCTTGAATAATTTGCAGG<br>CCTACCAGAACCGAATGGGAGTGCAGATGCAGCGATTCAAGTGAT<br>CCTCTTGTGTTGCCGCAATATCATTGGGATCCTGCACTTGATATT<br>GTGGATCCTTGATCGTCTTTTCTTCAAATGCATTTATCGTCGCCTTA<br>AATACGGTTTGAATAAGGGCCTTCTACGGAAGGGGTACCT<br>GAGTCTATGAGGGAAGAGTACCGGCAGGAACAGCAGAGTGCTGTG                                                                                                                                                                                                                                                                                                                                                                                                                                                                                                                                          |

|      |     |        |                                                                                                                                                                                                                                                                                                                                                                                                                                                                                                                                                                                                                                                                                                                                                                                                                                                                                                                                                                                                                                                                                                                                                                                                                                                                                                                                                                                                                                                                                                                                                                                                                                                                                                                                                                                                                                                                                                                        |
|------|-----|--------|------------------------------------------------------------------------------------------------------------------------------------------------------------------------------------------------------------------------------------------------------------------------------------------------------------------------------------------------------------------------------------------------------------------------------------------------------------------------------------------------------------------------------------------------------------------------------------------------------------------------------------------------------------------------------------------------------------------------------------------------------------------------------------------------------------------------------------------------------------------------------------------------------------------------------------------------------------------------------------------------------------------------------------------------------------------------------------------------------------------------------------------------------------------------------------------------------------------------------------------------------------------------------------------------------------------------------------------------------------------------------------------------------------------------------------------------------------------------------------------------------------------------------------------------------------------------------------------------------------------------------------------------------------------------------------------------------------------------------------------------------------------------------------------------------------------------------------------------------------------------------------------------------------------------|
|      |     |        | GATGTTGACGATGGTCATTTTGTCAACATAGAATTGGAGTAA                                                                                                                                                                                                                                                                                                                                                                                                                                                                                                                                                                                                                                                                                                                                                                                                                                                                                                                                                                                                                                                                                                                                                                                                                                                                                                                                                                                                                                                                                                                                                                                                                                                                                                                                                                                                                                                                             |
| NLCH | NS  | 1-838  | <p><b>ATGGACTCCA</b>ACTGTGTCAAGCTTTCAGGTAGACTGCTTTCCTT<br/> GGCATGTCCGCAAACGATTTGCAGACCAAGAAGTGGGTGATGCC<br/> CATTCCTTGACCGGCTTCGCCGAGACCAGAAGTCCCTAAGAGGAA<br/> GAGGCAGCACTCTTGGTCTGGACATCGAGACAGCTACTCGTGCG<br/> GGAAAGCAAATATTGGAGCGGATTCTGGGGGAAGAATCTGATGAA<br/> GCACTTAAAATGAATATTGCTTCTGTACCGACTTCACGCTACCTAA<br/> CTGACATGACTCTTGAAGAAATGTCAAGAGACTGGTTCATGCTCAT<br/> GCCAAGCAGAAAAGTAGCAGGTTCTCTCTGCATCAAAATGGACCA<br/> GGCAATAATGGATAAAAACCATCATACTGAAAGCAAACCTCAGTGT<br/> GATTTTGGATCGGCTGGAAACCCTAATATTACTTAGAGCTTTCACA<br/> GAAGAAGGAGCAATTGTGGGAGAAATCTCACCATTACCTTCTCTTC<br/> CAGGACATACTGATGAGGATGTCAAATTTGCAATTGGGGTCTCTCA<br/> TCGGAGGGCTTGAATGGAATGATAACACAGTTCGAGTCTCTGAAA<br/> CTCTACAGAGATTCACTTGGAGAAGCAGTAATGAGGATGGGAGAC<br/> CTTCACTCCCTTCAAAACAGAAACGGAAAATGGCGAGAACAATG<br/> AGTCAGAAGTTCGAGGAAATAAGATGGCTGATTGAGGAAATGCCGA<br/> CATAGATTGAAGATCACAGAGAACAGCTTCGAACAAATAACGTTT<br/> ATGCAAGCTTTACAACATTGCTTGAAGTGGAGCAAGAGATAAGA<br/> ACCTTCTCGTTTCAGCTTATTTAA</p>                                                                                                                                                                                                                                                                                                                                                                                                                                                                                                                                                                                                                                                                                                                                                                                                                                                                                                                         |
| DETU | PB2 | 1-2287 | <p><b>ATGGAGAGAATA</b>AAAAGAACTAAGAGATCTAATGTCTCAATCCCGC<br/> ACTCGCGAGATACTAACA AAAAACCCTGTGGACCATATGGCCATA<br/> ATCAAGAAATACACATCAGGAAGACAAGAGAAGAACCCTGCTCTC<br/> AGAATGAAATGGATGATGGCAATGAAATATCCAATCACAGCAGAC<br/> AAGAGAATAATGGAAATGATTCCTGAAAGAAATGAACAAGGCCA<br/> GACGCTTTGGAGCAAGACAAATGATGCTGGATCAGACAGAGTGAT<br/> GGTGTCTCCCTAGCTGTAACCTGGTGGAAATAGAAATGGACCGAC<br/> AGCAAGTACAGTCCATTATCCAAAGGTCTACAAAACATACTTTGA<br/> GAAGGTTGAAAGGTTAAAGCATGGAACCTTCGGTCCCGTTCACTTC<br/> CGAAACCAAATTA AAAATACGCCGCCGAGTTGACATAAACCAGGC<br/> CACGCAGATCTCAGTGCCAAAGAAGCACAAAGATGTCATCATGGAG<br/> GTCGTTTTCCCAAATGAAGTGGGAGCTAGAATATTGACATCAGAG<br/> TCACAATTGACAATAACGAAAGAGAAAAAGAAGA ACTCCAGGA<br/> TTGCAAGATTGCTCCTTAATGGTGGCATAACATGTTGGAAAGAGAA<br/> CTGGTCCGCAA AACAGATTCTACCAGTAGCAGGTGGGACAAGC<br/> AGTGTGTACATTGAGGTA CTGCACCTGACCCAAGGGACCTGCTGG<br/> GAACAGATGTACTCTCAGGCGGAGAAGTGAGAAATGACGATGTT<br/> GACCAGAGTTTGATCATCGCGCCAGAAACATTGTTAGGAGAGCA<br/> ACGGTATCAGCGGATCCACTGGCATCATTATTGGAGATGTGCCAC<br/> AGCACACAAATTGGTGGGACAAGGATGGTGGATATCCTTAGGCCAA<br/> AATCCA ACTGAGGAACAAGCTGTGGATATATGCAAAGCAGCAATG<br/> GGTTAAGGATTAGTTCATCCTTTAGCTTTGGAGGATTCACCTTCA<br/> AAAGAACAAGTGGTTCATCCATTAGAAAGGAAGGAAGTGCCTTA<br/> CAGGCAACCTCCAACATTGAAAATAAGAGTACATGAGGGGTAT<br/> GAGGAGTTCACAATGGTTGGGCGAAGAGCAACAGCCATTCTAAGG<br/> AAAGCAACTAGAAGGCTGATTGAGTTGATAGTAAGTGGAAAGAGAC<br/> GAACAATCAATCGCTGAAGCAATCATCGTAGCCATGGTGTCTCAC<br/> AGGAGGATTGCATGATAAAGGCAGTCCGAGGGGATCTAAATTTT<br/> GTGAACAGAGCAAACCAAAGATTGAACCCCATGCATCAACTCCTG<br/> AGACACTTCCAAAAGATGCAAAAAGTGCTGTTTCAAAATTGGGGG<br/> ATCGAACCCATTGATAATGTCATGGGGATGATTGGAATATTGCCTG<br/> ACATGACTCCAAGCACAGAGATGTCACTAAGAGGAGTAAGAGTT<br/> AGTAAAATGGGAGTAGATGAATATTCCAGCACTGAGAGAGTGGTT<br/> GTAAGCATTGACCGTTTCTTGCGGGTTTCGAGATCAGCAGGGGAAC<br/> GTACTCCTATCTCCCGAAGAAGTCAGCGAAACACTGGGAACAGAA<br/> AAATTAACAATAACATATTCATCATCAATGATGTGGGAAATCAAT</p> |

|      |     |        |                                                                                                                                                                                                                                                                                                                                                                                                                                                                                                                                                                                                                                                                                                                                                                                                                                                                                                                                                                                                                                                                                                                                                                                                                                                                                                                                                                                                                                                                                                                                                                                                                                                                                                                                                                                                                                                                                                                                                                                                                                                                                                                                                                        |
|------|-----|--------|------------------------------------------------------------------------------------------------------------------------------------------------------------------------------------------------------------------------------------------------------------------------------------------------------------------------------------------------------------------------------------------------------------------------------------------------------------------------------------------------------------------------------------------------------------------------------------------------------------------------------------------------------------------------------------------------------------------------------------------------------------------------------------------------------------------------------------------------------------------------------------------------------------------------------------------------------------------------------------------------------------------------------------------------------------------------------------------------------------------------------------------------------------------------------------------------------------------------------------------------------------------------------------------------------------------------------------------------------------------------------------------------------------------------------------------------------------------------------------------------------------------------------------------------------------------------------------------------------------------------------------------------------------------------------------------------------------------------------------------------------------------------------------------------------------------------------------------------------------------------------------------------------------------------------------------------------------------------------------------------------------------------------------------------------------------------------------------------------------------------------------------------------------------------|
|      |     |        | <p>GGTCCTGAGTCAGTGCTGGTCAACACCTATCAATGGATCATCAGA<br/> AATTGGGAGATTGTGAAGATTCAATGGTCTCAAGACCCCACGATG<br/> CTGTACAATAAGGTGGAGTTTGAACCGTTCCAATCCTTGGTACCTA<br/> AAGCTGCCAGAGGCCAATACAGTGGATTTGTGAGAACACTGTTC<br/> CAACAAATGCGTGACGTATTGGGGACATTTGATACTATTTCAGATA<br/> ATAAAGCTGTTACCGTTTGCAGCAGCCCCACCGGAGCATAGCAGA<br/> ATGCAATTTTCTCCCTGACCGTGAACGTAAGAGGCTCGGGAATGA<br/> GAATACTCGTAAGGGGTAACCTCCCCTGTGTTCAACTACAATAAG<br/> GCAACCAAAAGGCTTGCCGTCCTTGGAAAGGACGCAGGTGCATTA<br/> ACAGAGGATCCAGATGAGGGGACAACAGGAGTGGAATCTGCAGT<br/> GCTGAGGGGGTTCCTAATTCTGGGCAGGGAGGACAGAAGATATGG<br/> ACCAGCACTAAGCATCAATGAACTGAGCAATCTTGCGAAAGGGGA<br/> GAAAGCCAATGTGCTGATAGGGCAAGGAGACGTGGTGCTGGTAAT<br/> GAAACGGAAACGGGACTCTAGCATACTTACTGACAGCCAGACAGC<br/> GACCAAAAAGAATTCCGGATGGTCATCAATTAGTATCGAG</p>                                                                                                                                                                                                                                                                                                                                                                                                                                                                                                                                                                                                                                                                                                                                                                                                                                                                                                                                                                                                                                                                                                                                                                                                                                                                                                                                                                              |
| DETU | PB1 | 1-2277 | <p><b>ATGGATGTCAACCCGACTTTACTCTTCTTGAAGTGCCAGCGCAA</b><br/> ATGCTATAAGTACCACATTCCTTATACTGGAGATCCTCCATACAG<br/> CCATGGAACAGGAACAGGATACACCATGGACACAGTCAACAGAA<br/> CGCATCAATACTCAGAAAAGGGAAAGTGGACAAAAAACCCGAG<br/> ACTGGAGCACCCCAACTCAACCCAATTGATGGACCATTACCTGAG<br/> GATAACGAGCCAAGCGGATATGCACAAACGGATTGTGTGTTGGAA<br/> GCAATGGCTTTCTTGAAGAGTCCCACCCAGGGATCTTTGAAAAC<br/> CATGTCTTGAACAATGGAAATTGTTCAACAAACAAGAGTGGAC<br/> AAACTGACCCAAGGTCGTCAGACCTATGACTGGACATTGAATAGA<br/> AACCAGCCGGCTGCAACTGCTTTAGCCAACACTATAGAAGTCTTCA<br/> GATCGAACGGTCTAACAGCCAATGAGTCAGGGAGACTGATAGATT<br/> TCCTCAAAGATGTGATGGAGTCAATGGACAAAGAAGAAATGGAA<br/> ATAACAACACATTTCCAAAGAAAGAGAAGAGTAAGAGACAATAT<br/> GACCAAGAAAATGGTCACACAAAGAACAATAGGGAAGAAAAAAC<br/> AGAGACTGAACAAGAAGAACTACTTGGTAAGGGCACTGACACTGA<br/> ACACAATGACAAAAGATGCAGAAAGAGGCAAGTTGAAGAGGCGG<br/> GCAATTGCAACACCCGGGATGCAAATCAGAGGGTTCGTGTACTTT<br/> GTCGAAACATTAGCGAGGAGCATCTGCGAGAAACTTGAGCAATCT<br/> GGGCTCCCTGTTGGAGGAAATGAAAAAAGGCTAAGTTGGCAAAT<br/> GTCGTGAGAAAGATGATGACTAACTACAAGACACAGAGCTATCC<br/> TTTACAATTACTGGAGACAATACCAAGTGGAACGAGAATCAGAAT<br/> CCTCGGATTTTTTTGGCAATGATAACATATATCAAGAAATCAAC<br/> CTGAGTGGTTTAGAAATGTGTTAAGTATTGCCCTATAATGTTCTC<br/> AAACAAAATGGCAAGATTAGGGAAAGGATACATGTTTCGAAAGTA<br/> AGAGCATGAAGCTACGGACACAAATACCAGCAGAAATGCTTGCAA<br/> CCATTGACCTGAAATATTTCAACGAATCGACAAGAAAGAAAATTG<br/> AGAAAATAAGGCCTCTCCTAATAGAAGGGACAGCCTCGTTGAGTC<br/> CTGGAATGATGATGGGCATGTTCAACATGCTGAGTACAGTCTTGG<br/> GAGTATCAATTCTAAATCTTGGCCAAAAGAGGTACACCAAAACCA<br/> CATACTGGTGGGACGGACTCCAATCCTCTGATGATTTGCTCTCAT<br/> AGTAAATGCACCGAATCATGAGGGAATACAGGCAGGAGTGGACA<br/> GGTTCTATAGGACTTGTAATTTGGTTGGGATCAATATGAGTAAAA<br/> AGAAATCCTATATAAATCGGACAGGAACATTTGAATTCACAAGCT<br/> TTTTCTACCGTTATGGGTTTGTAGCCAACCTCAGCATGGAGCTGCC<br/> CAGCTTTGGAGTTTCTGGGATTAATGAATCGGCTGACATGAGCATT<br/> GGAGTTACAGTAATAAAGAATAACATGATAAACAACGATCTTGGGA<br/> CCAGCAACAGCTCAAATGGCTCTTCAGCTATTTATCAAGGACTACA<br/> GATATACATATCGATGCCACAGGGGTGATACACAAATACAAACAA<br/> GGAGATCATTCGAGCTAAAGAAGCTGTGGGAGCAGACCCGTTCAA<br/> AGGCAGGACTGTTGGTTTCAGATGGAGGCCCAACTTATACAAT<br/> ATACGGAATCTCCACATCCCAGAGGTCTGCTTGAAGTGGGAAGT</p> |

|      |    |        |                                                                                                                                                                                                                                                                                                                                                                                                                                                                                                                                                                                                                                                                                                                                                                                                                                                                                                                                                                                                                                                                                                                                                                                                                                                                                                                                                                                                                                                                                                                                                                                                                                                                                                                                                                                                                                                                                                                                                                                                                                                                                                                                                                                                                                                                                                                                                                                                                                                  |
|------|----|--------|--------------------------------------------------------------------------------------------------------------------------------------------------------------------------------------------------------------------------------------------------------------------------------------------------------------------------------------------------------------------------------------------------------------------------------------------------------------------------------------------------------------------------------------------------------------------------------------------------------------------------------------------------------------------------------------------------------------------------------------------------------------------------------------------------------------------------------------------------------------------------------------------------------------------------------------------------------------------------------------------------------------------------------------------------------------------------------------------------------------------------------------------------------------------------------------------------------------------------------------------------------------------------------------------------------------------------------------------------------------------------------------------------------------------------------------------------------------------------------------------------------------------------------------------------------------------------------------------------------------------------------------------------------------------------------------------------------------------------------------------------------------------------------------------------------------------------------------------------------------------------------------------------------------------------------------------------------------------------------------------------------------------------------------------------------------------------------------------------------------------------------------------------------------------------------------------------------------------------------------------------------------------------------------------------------------------------------------------------------------------------------------------------------------------------------------------------|
|      |    |        | <p>ATGGATGAAGATTACCAGGGTAGACTTTGTAATCCCCTGAACCCCT<br/> TTGTCAGTCATAAGGAAATTGAATCCGTAACAATGCTGTAGTGAT<br/> GCCAGCCCATGGTCCGGCCAAAAGCATGGAATATGATGCTGTT<br/> GCGACCACACACTCATGGGTCCCTAAGAGGAACCGTTCATTCTG<br/> AATACCAGTCAAAGAGGAATCCTTGAGGATGAACAGATGTATCAG<br/> AAGTGCTGCAATCTATTTGAAAAATCCTCCCTAGTAGCTCATACA<br/> GGAGGCCAGTTGGAATCTCCAGTATGGTGGAGGCCATGGTGTCT<br/> AGGGCCCCGAATTGATGCACGGATTGACTTCGAGTCTGGTAGGATT<br/> AAGAAGGAAGAGTTTGCTGAGATCATGAAGATCTGTTCCACCATT<br/> GAAGAGATCAGACGGCAAAAACAGTGA</p>                                                                                                                                                                                                                                                                                                                                                                                                                                                                                                                                                                                                                                                                                                                                                                                                                                                                                                                                                                                                                                                                                                                                                                                                                                                                                                                                                                                                                                                                                                                                                                                                                                                                                                                                                                                                                                                                                                                                      |
| DETU | PA | 7-2190 | <p>GACTTTGTGCGACAATGCTTCAATCCAATGATCGTCGAGCTTGCGG<br/> AAAAGACAATGAAAGAATATGGGGAAAATCCAAAATCGAAACG<br/> AACAAATTCGCTGCAATATGCACTCACTTAGAGGTCTGTTTCATGT<br/> ATTTCGGATTTCCACTTTATTGATGAACGAGGTAATCAATAATTGT<br/> AGAATCTGGCGATCCGAATGCATTATTGAAACACCGATTTGAGAT<br/> AATTGAAGGGAGGGACCGAACGATGGCTTGGACAGTGGTAAATAG<br/> TATCTGCAACACCACAGGAGTCGATAAGCCTAAATTCCTCCAGAT<br/> TTGTATGATTACAAGGAGAACCGATTCAATGAAATTGGAGTGACA<br/> AGGAGGGAAGTTCACACATACTACCTAGAAAAGGCAAATAAGATA<br/> AAATCAGAGAAGACACACATTCACATATTCTCATTCACTGGGGAG<br/> GAGATGGCCACCAAAGCTGATTATATCCTTGATGAAGAGAGCAGA<br/> GCAAGGATCAAACCAGGTTGTTCACTATCAGGCAAGAAATGGCC<br/> AATAGGGGTCTGTGGGATTCCTTTTCGTCAATCTGAGAGAGGCGAA<br/> GAGACAATTGAAGAAAGGTTTGAATCACAGGAACCATGCGCAGG<br/> CTTGCCGACCAAAGTCTCCACCGAATTTCTCCAGCCTTGAAAATT<br/> TTAGAGCCTATGTGGATGGATTCAAACCGAACGGCTGCCTTGAGG<br/> GCAAGCTTTCTCAAATGTCAAAGAAGTGAACGCCAGAATTGAGC<br/> CATTCATGAAGACAACACCACGCCCTCTCAGATTACCTGATGGTCC<br/> TCCTTGCTCTCAGCGGTGCGAAATTCCTACTGATGGATGCTCTTAAA<br/> TTGAGCATCGAAGACCCAAGCCATGAGGGAGAAGGTATACCGCTA<br/> TATGATGCAATCAAATGCATGAAGACGTTTTTTGGTTGGAAAGAG<br/> CCCAACATTGTAACCACATGTAAGGACATAAATCCCAACTAT<br/> CTCTTGGCTTGGAAAGCAGGTGCTGGTAGAACTCCAAGACATTGAA<br/> AATGAAGAGAAAATCCCAAAAACAAAAACATGAAGAAAACAAG<br/> CCAATAAGTGGGCACTCGGTGAGAATATGGCACCTGAAAAAGT<br/> GGACTTTGAGGACTGCAAAGATGTTAGCGATCTAAGACAGTATGA<br/> CAGTGATGAACCAGAGCCCAGATCATTATCAAGCTGGATCCAGAG<br/> CGAATTCAACAAAGCATGCGAATTGACAGATTTCGAGTTGGATTGA<br/> ACTTGATGAAATAGGAGAAGATGTTGCTCCAATTGAGCACATTGC<br/> GAGTATGAGAAGAACTACTTCACAGCGGAAGTGTCTCATTGCAG<br/> GGCTACTGAATATATAATGAAAGGAGTTTATATAAATACAGCCCT<br/> GTTGAATTCATCCTGTGCAGCCATGGATGACTTCCAATTGATTCCA<br/> ATGATAAGCAAGTGCAGAACCAAAGAAGGAAGACCGGAAGACAAA<br/> TCTATATGGGTTTCATTATAAAAAGGAAGATCCCATTTGAGGAATGAT<br/> ACCGATGTGGTAAATTTTGTGAGCATGGAGTTCTCTCTTACTGACC<br/> CGAGGCTGGAACCACACAAGTGGGAAAAGTACTGTGTTCTCGAAA<br/> TAGGAGACATGCTCCTACGAACTGCAATAGGCCAAGTATCAAGAC<br/> CCATGTTTCTTTATGTAAGGACCAATGGGACTTCCAAGATCAAGAT<br/> GAAATGGGGCATGGAGATGAGGCGATGCCTTCTTCAATCCCTCCA<br/> ACAAATTGAGAGCATGATTGAGGCAGAATCTTCTGTCAAAGAGAA<br/> GGACATGACCAAGGAATTCTTTGAAAATAAATCAGAAACGTGGCC<br/> AATTGGGGAATCACCTAAGGGGGTGGAGGAAAGCTCTATTGGGAA<br/> AGTGTGTAGAACATTACTAGCAAAATCTGTATTCAACAGCCTATAT<br/> GCATCTCCACAACCTGAGGGGTTTTTCAGCTGAGTCGAGAAAGTTAC<br/> TTCTCATTGTTCAAGCATTAGGGACAACCTGGAACCTGGGACCTT<br/> CGATCTTGGGGGGCTATATGAAGCAATTGAGGAGTGCCTGATTAA</p> |



|      |    |        |                                                                                                                                                                                                                                                                                                                                                                                                                                                                                                                                                                                                                                                                                                                                                                                                                                                                                                                                                                                                                                                                                                                                                                                                                                                                                                                                                                                                                                                                                                                                                                                                                                                                                                                                                                                                                                                                                                                                                      |
|------|----|--------|------------------------------------------------------------------------------------------------------------------------------------------------------------------------------------------------------------------------------------------------------------------------------------------------------------------------------------------------------------------------------------------------------------------------------------------------------------------------------------------------------------------------------------------------------------------------------------------------------------------------------------------------------------------------------------------------------------------------------------------------------------------------------------------------------------------------------------------------------------------------------------------------------------------------------------------------------------------------------------------------------------------------------------------------------------------------------------------------------------------------------------------------------------------------------------------------------------------------------------------------------------------------------------------------------------------------------------------------------------------------------------------------------------------------------------------------------------------------------------------------------------------------------------------------------------------------------------------------------------------------------------------------------------------------------------------------------------------------------------------------------------------------------------------------------------------------------------------------------------------------------------------------------------------------------------------------------|
|      |    |        | TGATCCCTGGGTTTTGCTTAATGCATCTTGGTTCAACTCCTTCCTTA<br>CACATGCACTGAAATAGTTGTGGCAATGCTACTATTTGCTATCCAT<br>ACTGTCCAA                                                                                                                                                                                                                                                                                                                                                                                                                                                                                                                                                                                                                                                                                                                                                                                                                                                                                                                                                                                                                                                                                                                                                                                                                                                                                                                                                                                                                                                                                                                                                                                                                                                                                                                                                                                                                                       |
| DETU | HA | 1-1728 | <b>ATGGAGAAAATAGTGCTTCTTCTTGCAGTGGTTAGCCTTGTAAAA</b><br>GTGATCAGATTTGCATTGGTTACCATGCAAACAACCAACAAAAC<br>AGGTTGACACAATAATGGAAAAAACGTCCTACTGTTACACATGCC<br>AAGACATACTGGAAAAGACACACAACGGGAAGCTCTGCGATCTTA<br>ATGGAGTGAAGCCCCTGATTCTAAAGGATTGTAGCGTAGCTGGGT<br>GGCTCCTTGGAATCCAATGTGCGACGAGTTTATCAGGGTGCCGG<br>AATGGTCTTACATCGTGGAGAGGGCTAACCCAGCCAACGACCTCT<br>GTTACCCAGGGACCCTCAATGACTATGAGGAACTGAAACACCTA<br>CTGAGCAGAATAAATCATTTTGAGAAAACCTCTGATCATCCCAAG<br>AGTTCTTGGCCAATCATGAAACATCATTAGGGGTGAGCGCAGCA<br>TGCCATAACCAGGGAGCATCCTCATTTTTCAGAAATGTGGTATGGC<br>TCATCAAAAAGAACGATGCATACCCGACAATAAAGATAAGCTAC<br>AATAATACCAATCGGGAAGATCTTTTGATACTGTGGGGGATTTCATC<br>ATCCCAACAATGCAGAAGAGCAGACAAAATCTCTATAAAAACCCAG<br>ACACTTATGTTTCCGTTGGGACATCAACATTAACAGAGATTGGT<br>GCCAAAAATAGCTACTAGATCCCAAGTAAACGGGCAACGTGGAAG<br>AATGGATTTCTTCTGGACAATTTTAAAACCGAATGATGCAATCCAC<br>TTTGAGAGTAATGGAAATTTTATTGCTCCAGAATATGCCTACAAAA<br>TTGTCAAGAAAGGGGACTCAACAATTATGAAAAGTGAAGTGGAGT<br>ATGGCCACTGCAACACCAATGTCAAACCCCAATAGGGGCGATAA<br>ACTTAGCATGCCATTCCACAATATACACCCTCTCACCATCGGGGA<br>ATGCCCCAAATATGTGAAGTCAAACAATTAGTCCTTGCAGCTGG<br>GCTCAGAAATAGTCCTCTAAGGGAAAGAAGAAGAAAAAGAGGAC<br>TATTTGGAGCTATAGCAGGGTTTATAGAGGGAGGATGGCAGGGAA<br>TGGTAGACGGTTGGTATGGGTACCACCATAGCAATGAGCAGGGGA<br>GTGGGTACGCTGCAGACAAAGAATCCACCCAAAAGGCAGTAGATG<br>GAGTTACCAATAAGGTCAACTCAATCATTGACAAAATGAACACTC<br>AATTTGAGGCCGTTGGAAGGGAATTTAATAACTTAGAAAGGAGAA<br>TAGAGAATTTAAACAAGAAAATGGAAGACGGATTCCTAGATGTCT<br>GGACTTATAATGCTGAACTTTTAGTTCTTATGGAAAATGAGAGAAC<br>TCTAGATTTCCATGACTCAAATGTCAAGAACCTTTACGACAAAAGTC<br>CGACTACAGCTTAGGGATAATGCAAAGGAGCTGGGTAATGGTTGT<br>TTCGAGTTCTATCAAAATGTGATAACGAATGTATGGAAAGCGTA<br>AGAAATGGGACGTATGACTACCCTAAGTATTCAGAAGAAGCAAGA<br>TTAAAAGAGAAGAAATAAGCGGAGTGAATTAGAATCAATAGG<br>AACTTACCAATACTGTCAATTTATTCAACAGTGGCGAGTTCCTA<br>GCACTGGCAATCATAGTGGCTGGTCTATCTTTATGGATGTGCTCTA<br>ATGGGTCGCTACAATGCAGAATTTGCATCTAAATTTGTGAGCTCAG<br>ATTGTAATTA |
| DETU | NP | 1-1497 | <b>ATGGCGTCTCAAGGCACCAACGATCTTATGAACAGATGGAAACT</b><br>GGTGGAGAACGCCAGAATGCCACTGAAATCAGAGCATCTGTTGGA<br>AGAATGGTTGGTGAATTGGAAGGTTTTATATACAGATGTGCACT<br>GAACTCAAACCTCAGCAATTATGAGGGGAGACTGATCCAGAACAGC<br>ATAACAATAGAAAGAATGGTTCTCTCTGCATTTGATGAAAGGAGG<br>ACAAGTACCTGGAAGAACATCCCAGTGCGGGGAAGGACCCAAA<br>GAAAACCTGGAGGTCCAATCTACAGAAGAAGAGACGGAAAGTGG<br>TGAGGGAGCTGATTCTGTATGACAAAAGAAGAGATCAGAAGGATCT<br>GGCGTCAAGCAAATAATGGAGAAGATGCAACTGCTGGTCTCACCC<br>ATCTGATGATCTGGCACTCCAACCTGAATGATGCCACATATCAGAG<br>GACAAGGGCTCTCGTGCGCACTGGAATGGATCCAGAATGTGCTC<br>TCTGATGCAAGGATCAACTCTCCAAGAAGGTCTGGAGCTGCTGG<br>TGCAGCAGTAAAAGGGGTCCGAACAATGGTAATGGAATTGATTG<br>AATGATAAAGCGAGGGATTAATGATCGGAATTTCTGGAGAGGCCGA                                                                                                                                                                                                                                                                                                                                                                                                                                                                                                                                                                                                                                                                                                                                                                                                                                                                                                                                                                                                                                                                                                                                                                                                                                        |

|      |    |        |                                                                                                                                                                                                                                                                                                                                                                                                                                                                                                                                                                                                                                                                                                                                                                                                                                                                                                                                                                                                                                                                                                                                                                                                                                                                                                                                                                                                                                                                                                                                                                                                  |
|------|----|--------|--------------------------------------------------------------------------------------------------------------------------------------------------------------------------------------------------------------------------------------------------------------------------------------------------------------------------------------------------------------------------------------------------------------------------------------------------------------------------------------------------------------------------------------------------------------------------------------------------------------------------------------------------------------------------------------------------------------------------------------------------------------------------------------------------------------------------------------------------------------------------------------------------------------------------------------------------------------------------------------------------------------------------------------------------------------------------------------------------------------------------------------------------------------------------------------------------------------------------------------------------------------------------------------------------------------------------------------------------------------------------------------------------------------------------------------------------------------------------------------------------------------------------------------------------------------------------------------------------|
|      |    |        | AAATGGAAGAAGGACAAGGATTGCCTATGAGAGAATGTGCAACAT<br>CCTCAAAGGGAAATTTCAAACAGCAGCACAAAGAGCAATGATGGA<br>TCAAGTGCAGAAAGCAGGAATCCTGGGAATGCTGAAATTGAAGA<br>TCTCATTTTTCTGGCACGGTCTGCACTCATCCTGAGAGGATCAGTG<br>GCCACAAGTCTTGTCTGCCTGCTTGTGTTTACGGACTTGCTGTGG<br>CCAGTGGATATGACTTTGAGAGAGAAGGATACTCTCTGGTTGGA<br>ATAGACCCTTTCCGTCTGCTTCAAACAGCCAGGCTTTCAGTCTCA<br>TTAGACCAAATGAAAACCCAGCACATAAAAAGTCAGTTGGTATGGA<br>TGGCATGCCATTCAGCAGCGTTTGAGGACCTGAGGGTATCAAGTTT<br>CATCAGAGGGACAAGAGTGGTCCCAAGAGGACAACATCCACCAG<br>AGGAGTTCAAATTGCATCAAATGAAAACATGGAAACAATGGACTC<br>CAGCACTCTTGAATTGAGGAGCAGATACTGGGCTATAAGAACCAG<br>GAGTGGAGGAAACACCAACCAACAGAGAGCTTCTGCAGGACAAA<br>TCAGCGTACAACCCACCTTCTCAGTACAGAGAAATCTTCCCTTTGA<br>AAGAGCGACCATCATGGCGGCATTTACAGGGAACACTGAAGGCAG<br>GACCTCTGACATGAGGACTGAGATCATAAAGAATGATGGAAAGTC<br>CAAACCAGAAGATGTGTCCTTCCAGGGGCGGGGAGTCTTCGAGCT<br>CTCGGACGAAAAGGCAACGAACCCGATCGTGCCTTCTTTGACAT<br>GAGCAACGAAGGATCTTATTTCTTCGGAGACAGTGCAGAGGAGTA<br>TGACAATTA                                                                                                                                                                                                                                                                                                                                                                                                                                                                                                                                                                                                                      |
| DETU | NA | 1-1413 | <b>ATGAATCCAAATCAGAAAATAGTAACCATTGGCTCCATTTCATT</b><br>GGGTTGGTTGTATTCAATGTTCTACTGCATGCTGTGAGCATCATAT<br>TAACAGTGTTAGCCCTGGGGAAGAGTGAAAACAATGGAATCTGCA<br>ATGGAAGTGTAGTGAGGGAATACAATGAAACAGTTAGAATAGAG<br>AAAGTGACTCAATGGTACAATACTAGCGTAGTCGAATATGTACCG<br>CATTGGAATGAGGGCACTTATATAAATAACACCGAACCAATATGT<br>GATGTCAAGGGCTTTGCACCTTTTTCCAAGGACAACGGGATAAGA<br>GTTGGCTCCAGGGGACATATTTTTGTCATAAGAGAGCCTTTTCGTC<br>TCTTGTTACCTGTAGAGTGCAGGACTTTCTTCTCACTCAGGGAT<br>CTCTACTCAATGACAAACACTCAAATGGAACAGTGAAGGATAGAA<br>GCCATTCAGAACTCTCATGAGTGTGCAAGTGGGCAATCACCA<br>ATGTATATCAAGCCAGGTTTGAAGCTGTGGCATGGTCAGCAACA<br>GCCTGTCATGATGGTAAGAAGTGGATGACGATTGGTGTAACAGGG<br>CCAGATTCTAAAGCAGTAGCAGTAGTTCATTACGGAGGGGTGCT<br>ACTGACGTTGTTAACTCCTGGGCAGGAGATATATTAAGAACTCAG<br>GAGTCATCTTGTACTTGCATTCAAGGTAATTGTTATTGGGTAATG<br>ACTGACGGTCTGCCAATAGACAGGGCGCAGTATAGAATATACAAA<br>GCAAATCAAGGCAAAAATAATTGGCCGAACAGATGTTAGCTTTAGT<br>GGAGGACATATTGAGGAATGTTCTTGTATCCAAATGATGGTAAA<br>GTGGAATGCGTGTGTAGAGACAACACTGGACGGGAACAAACAGGCCT<br>GTAATAATTATTCGCCTGATCTCTTACAGGGTGGGTATTTATG<br>TGCAGGGTTGCCAGTGACACTCCAAGAGGGGAAGATACTCAATT<br>TGTCGGTTCATGCACTAGTCCCATGGGAAATCAGGGATATGGCGT<br>AAAAGGGTTCGGGTTTCGACAGGGAACCTGATGTGTGGGTGGGG<br>CGGACAATTAGTCGAACCTCCAGATCAGGATTTGAAATAATAAGG<br>ATAAAGAATGGTTGGACGCAAAACAAGCAAAGAACAGATTAGAAG<br>ACAGGTGGTTGTTGATAACTCGAATTGGTTCGGGATACAGTGGGTCT<br>TTCATTTACCAGTAGAATTGTCTGGGAGGGAATGTTTGGTTCCC<br>TGTTTTTGGGTCGAAATGATCAGAGGTAGGCCAGAAGAGAGAACA<br>ATCTGGACCTTAGTAGCTCCATTGTAATGTGTGGAGTTGATTATG<br>AAATTGCCGATTGGTCATGGCACGATGGAGCTATTCTTCCCTTTGA<br>CATCGATAAGACGTAA |
| DETU | MP | -1-982 | <b>GATGAGTCTTCTAACCGAGGTCGAAACGTACGTTCTCTCTATCATC</b><br>CCGTCAGGCCCCCTCAAAGCCGAGATCGCGCAGAGACTTGAAGAT<br>GTCTTTGCAGGGAAAAACACCGATCTCGAGGCTCTCATGGAGTGG<br>CTAAAGACAAGACCAATCCTGTCACCTCTGACTAAAGGGATTTTG                                                                                                                                                                                                                                                                                                                                                                                                                                                                                                                                                                                                                                                                                                                                                                                                                                                                                                                                                                                                                                                                                                                                                                                                                                                                                                                                                                                         |

|      |     |        |                                                                                                                                                                                                                                                                                                                                                                                                                                                                                                                                                                                                                                                                                                                                                                                                                                                                                                                                                                                                                |
|------|-----|--------|----------------------------------------------------------------------------------------------------------------------------------------------------------------------------------------------------------------------------------------------------------------------------------------------------------------------------------------------------------------------------------------------------------------------------------------------------------------------------------------------------------------------------------------------------------------------------------------------------------------------------------------------------------------------------------------------------------------------------------------------------------------------------------------------------------------------------------------------------------------------------------------------------------------------------------------------------------------------------------------------------------------|
|      |     |        | <p>GGATTTGTGTTACGCTCACCGTGCCCAGTGAGCGAGGACTGCAG<br/> CGTAGACGCTTCGTCCAGAATGCCCTAAATGGAAACGGGGATCCA<br/> AATAATATGGATAAAGGCAGTTAAGCTATATAAGAAGCTGAAAAGA<br/> GAGATAACATTCCATGGGGCTAAGGAGGTCGCACTTAGCTACTCA<br/> ACCGGTGCACTTGCCAGCTGCATGGGTCTCATATAACAACAGGATG<br/> GGAACGGTGACTACAGAAGTGGCTTTTGGCCTAGTGTGTGCCACTT<br/> GTGAGCAGATTGCAGATTCACAGCATCGGTCCCACAGACAGATGG<br/> CAACCATCACCAACCCATTAATCAGACATGAGAACAGAATGGTGC<br/> TGGCCAGCACTACAGCTAAGGCCATGGAGCAGATGGCAGGATCAA<br/> GCGAGCAGGCATCAGAAGCCATGGAGGTTGTAATCAGGCCAGGC<br/> AGATGGTACAGGCAATGAGGACAATTGGGACTCATCCTAACTCTA<br/> GTGCTGGTCTGAGAGATAATCTTCTTGAAAATTTGCAGGCCTACCA<br/> GAACCGAATGGGAGTGCAGATGCAGCGATTCAAGTGATCCTCTTG<br/> TTGTTGCCGCAATATCATTGGGATCCTGCACTTGATATTGTGGAT<br/> CCTTGATCGTCTTTTCTCAAATGCATTTATCGTCGCCTTAAATACG<br/> GTTTGAANAATAGGGCCTTCTACGGAAGGGTACCTGAGTCTATGA<br/> GGAAAGAGTACCGGCAGGAACAGCAGAGGTGCTGTGGATGTTGACG<br/> ATGGTCATTTTGTCAACATAGAATTGGAGTAA</p>                                                                 |
| DETU | NS  | 2-838  | <p><b>T</b>GACTCCAACACTGTGTCAAGCTTTCAGGTAGACTGCTTTCTTTG<br/> GCATGTCCGCAAACGATTTGCAGACCAAGAAGTGGGTGATGCCCC<br/> ATTCTTGACCGGCTTCGCCGAGACCAGAAGTCCCTAAGAGGAAG<br/> AGGCAGCACTCTGGTCTGGACATCGAGACAGCTACTCGTGCGGG<br/> AAAGCAAATATTGGAGCGGATTCTGGGGGAAGAATCTGATGAAGC<br/> ACTTAAAATGAATATTGCTTCTGTACCGACTTCACGCTACCTAACT<br/> GACATGACTCTTGAAGAAATGTCAAGAGACTGGTTCATGCTCATG<br/> CCAAGCAGAAAGTAGCAGGTTCTCTCTGCATCAAATGGACCAG<br/> GCAATAATGGATAAAAACCATCATACTGAAAGCAAACCTTCAGTGTG<br/> ATTTTTGATCGGCTGGAACCCTAATATTACTTAGAGCTTTCACAG<br/> AGAAGGAGCAATTGTGGGAGAAATCTCACCATTACCTTCTCTTCC<br/> AGGACATACTGATGAGGATGTCAAATTGCAATTGGGGTCCCTCAT<br/> CGGAGGGCTTGAATGGAATGATAACACAGTTCGAGTCTCTGAAAC<br/> TCTACAGAGATTCACTTGGAGAAGCAGTAATGAGGATGGGAGACC<br/> TTCCTCCCTTCAAAAACAGAAACGGAAAATGGCGAGAACAATTGA<br/> GTCAGAAGTTCGAGGAAATAAGATGGCTGATTGAGGAAATGCGAC<br/> ATAGATTGAAGATCACAGAGAACAGCTTCGAACAAATAACGTTTA<br/> TGCAAGCTTTACAACATTTGCTTGAAGTGGAGCAAGAGATAAGAA<br/> CCTTCTCGTTTCAGCTTATTTAA</p>                     |
| UKDD | PB2 | 1-2298 | <p><b>A</b>TGGAGAGAATAAAAAGAACTAAGAGATCTAATGTCTCAATCCCGC<br/> ACTCGCGAGATACTAACAAAACCACTGTGGACCATATGGCCATA<br/> ATCAAGAAATACACATCAGGAAGACAAGAGAAGAACCCTGCTCTC<br/> AGAATGAAATGGATGATGGCAATGAAATATCCAATCACAGCAGAC<br/> AAGAGAATAATGGAAATGATTCCTGAAAGAAATGAACAAGGCCA<br/> GACGCTTTGGAGTAAGACAAATGATGCTGGATCAGACAGAGTGAT<br/> GGTGTCTCCCCTAGCTGTAACCTTGGTGGAATAGAAATGGACCGAC<br/> AGCAAGTACAGTCCATTATCCAAAGGTCTACAAAACATACTTTGA<br/> GAAGGTTGAAAGGTTAAAGCATGGAACCTTCCGTCCCCTTCACTTC<br/> CGAAACCAAATTAATAACGCCGCGGAGTTGACATAAACCCAGGC<br/> CACGCAGATCTCAGTGCCAAAGAAGCACAAGATGTCATCATGGAG<br/> GTCGTTTTCCCAAATGAAGTGGGAGCTAGAATATTGACATCAGAG<br/> TCACAATTGACAATAACGAAAGAGAAAAAAGAAGAACTCCAGGA<br/> TTGCAAGATTGCTCCTTTAATGGTGGCATAACATGTTGGAAAGAGAA<br/> CTGGTCCGCAAACAGATTCTACCAGTAGCAGGTGGGACAAGC<br/> AGTGTGTACATTGAGGTACTGCACTTGACCCAAGGGACCTGCTGG<br/> GAACAGATGTACACTCCAGGCGGAGAAGTGAGAAATGACGATGTT<br/> GACCAGAGTTTGATCATCGCGCCAGAAACATTGTTAGGAGAGCA<br/> ACGGTATCAGCGGATCCACTGGCATCATTATTGGAGATGTGCCAC</p> |

|      |     |        |                                                                                                                                                                                                                                                                                                                                                                                                                                                                                                                                                                                                                                                                                                                                                                                                                                                                                                                                                                                                                                                                                                                                                                                                                                                                                                                                                                                                                                                                                                                                                                                                                                                                                           |
|------|-----|--------|-------------------------------------------------------------------------------------------------------------------------------------------------------------------------------------------------------------------------------------------------------------------------------------------------------------------------------------------------------------------------------------------------------------------------------------------------------------------------------------------------------------------------------------------------------------------------------------------------------------------------------------------------------------------------------------------------------------------------------------------------------------------------------------------------------------------------------------------------------------------------------------------------------------------------------------------------------------------------------------------------------------------------------------------------------------------------------------------------------------------------------------------------------------------------------------------------------------------------------------------------------------------------------------------------------------------------------------------------------------------------------------------------------------------------------------------------------------------------------------------------------------------------------------------------------------------------------------------------------------------------------------------------------------------------------------------|
|      |     |        | <p>AGCACACAAATTGGTGGGACAAGGATGGTGGATATCCTTAGGCCAA<br/> AATCCAAGTGAAGCAAGCTGTGGATATATGCAAAGCAGCAATG<br/> GGTTTAAGGATTAGTTCATCCTTTAGCTTTGGAGGATTCACCTTCA<br/> AAAGAACAAGTGGTTCATCCATTAGAAAGGAAGAGGAAGTGCTTA<br/> CAGGCAACCTCCAACATTGAAAATAAGAGTACATGAGGGGTATG<br/> AGGAGTTCACAATGGTTGGGCGAAGAGCAACAGCCATTCTAAGGA<br/> AAGCAACTAGAAGGCTGATTGAGTTGATAGTAAGTGAAGAGACG<br/> ACAATCAATCGCTGAAGCAATCATCGTAGCCATGGTGTCTCACA<br/> GGAGGATTGCATGATAAAGGCAGTCCGAGGCGATCTAAATTTTGT<br/> GAACAGAGCAAACCAAAGATTGAACCCCATGCATCAACTCCTGAG<br/> ACACTTCCAAAAAGATGCAAAAGTGCTGTTTCAAATTTGGGGGAT<br/> TGAACCCATTGATAATGTCATGGGGATGATTGGAATATTGCCTGAC<br/> ATGACTCCAAGCACAGAGATGTCATAAGAGGAGTAAGAGTTAGT<br/> AAAATGGGAGTAGATGAATATTCCAGCACTGAGAGAGTGGTTGTA<br/> AGCATTGACCGTTTCTTGCGGGTTTCGAGATCAGCAGGGGAACCTAC<br/> TCCTATCTCCCGAAGAAGTCAAGCAACACTGGGAACAGAAAAG<br/> TAACAATAACATATTATCATCAATGATGTGGGAAATCAATGGTCC<br/> TGAGTCAGTGTGGTCAACACCTATCAATGGATCATCAGAAATTG<br/> GGAGATTGTGAAGATTCAATGGTCTCAAGACCCACGATGCTGTA<br/> CAATAAGGTGGAGTTTGAACCGTTCCAATCCTTGGTACCTAAAGCT<br/> GCCAGAGGCCAATACAGTGGATTGTGAGAACACTGTTCCAACAA<br/> ATGCGTGACGTATTGGGGACATTTGATACTATTGAGATAATAAAGC<br/> TGTTACCGTTTGCAGCAGCCCCACCGGAGCATAGCAGAATGCAAT<br/> TTTCTTCCCTGACCGTGAATGTAAGAGGCTCGGGAATGAGAATACT<br/> CGTAAGGGGTAACCTCCCTGTGTTCAACTACAATAAGGCAACCAA<br/> AAGGCTTGCCGTCCTTGGAAAGGACGCAGGTGCATTAACAGAGGA<br/> TCCAGATGAGGGGACAACAGGAGTGAATCTGCAGTGTGAGGGG<br/> GTTCCCTAATTCTGGGCAGGGAGGACAGAAGATATGGACCAGCACT<br/> AAGCATCAATGAACTGAGCAATCTTGCAGAAAGGGGAGAAAGCCA<br/> ATGTGCTGATAGGGCAAGGAGACGTGGTGTGGTAATGAAACGGA<br/> AACGGGACTCTAGCATACTTACTGACAGCCAGACAGCGACCAAAA<br/> GAATTCGGATGGTTCATCAATTAGTATCGAGTTGTTTAAAAA</p> |
| UKDD | PB1 | 1-2277 | <p><b>ATGGATGTCAACCCGACTTTACTCTTCTTGAAAGTGCCAGCGCAA</b><br/> ATGCTATAAGTACCACATTCCCTTATACTGGAGATCCTCCATACAG<br/> CCATGGAACAGGAACAGGATACACCATGGACACAGTCAACAGAA<br/> CGCATCAATACTCAGAAAAGGGAAAGTGGACAAAAAACCCGAG<br/> ACTGGAGCACCCCAACTCAACCAATTGATGGACCATTACCTGAG<br/> GATAACGAGCCAAGCGGATATGCACAAACGGATTGTGTGTTGGAA<br/> GCAATGGCTTTCCTTGAAGAGTCCCACCCAGGGATCTTTGAAA<br/> ACTCATGTCTTGAACAATGGAAATTGTTCAACAACAAGAGTGGACA<br/> AACTGACCCAAGGTCGTCAGACCTATGACTGGACATTGAATAGAA<br/> ACCAGCCGGCTGCAACTGCTTTAGCCAACACTATAGAAGCTTTCAG<br/> ATCGAACGGTCTAACAGCCAATGAGTCAGGAGACTGATAGATTT<br/> CCTCAAAGATGTGATGGAGTCAATGGACAAAGAAGAAATGGAAAT<br/> AACAAACATTTCCAAAGAAAGAGAAGAGTAAGAGACAATATGA<br/> CCAAGAAAATGGTCACACAAAGAACAATAGGGAAAGAAAAACAG<br/> AGACTGAACAAGAAGAATACTTGGTAAGGGCACTGACACTGAAC<br/> ACAATGACAAAAGATGCAGAAAGAGGCAAGTTGAAGAGGCGGGC<br/> AATTGCAACACCCGGGATGCAAATCAGAGGGTTCGTGTACTTTGTC<br/> GAAACATTAGCGAGGAGCATCTGCGAGAACTTGAGCAATCTGGG<br/> CTCCCTGTTGGAGGAAATGAAAAAAGGCTAAGTTGGCAAATGTC<br/> GTGAGAAAGATGATGACTAACTACAAGACACAGAGCTATCCTTT<br/> ACAATTACTGGAGACAATACCAAGTGAACGAGAATCAGAATCCT<br/> CGGATTTTTTTGGCAATGATAACATATATCACAAGAAATCAACCTG<br/> AGTGGTTTAGAAATGTGTTAAGTATTGCCCTATAATGTTCTCAA<br/> CAAATGCCAAGATTAGGGAAAGGATACATGTTGAAAGTAAG</p>                                                                                                                                                                                                                                                                                                                                                                                                                          |

|      |    |        |                                                                                                                                                                                                                                                                                                                                                                                                                                                                                                                                                                                                                                                                                                                                                                                                                                                                                                                                                                                                                                                                                                                                                                                                                                                                                                                                                                                                                                                                                                                              |
|------|----|--------|------------------------------------------------------------------------------------------------------------------------------------------------------------------------------------------------------------------------------------------------------------------------------------------------------------------------------------------------------------------------------------------------------------------------------------------------------------------------------------------------------------------------------------------------------------------------------------------------------------------------------------------------------------------------------------------------------------------------------------------------------------------------------------------------------------------------------------------------------------------------------------------------------------------------------------------------------------------------------------------------------------------------------------------------------------------------------------------------------------------------------------------------------------------------------------------------------------------------------------------------------------------------------------------------------------------------------------------------------------------------------------------------------------------------------------------------------------------------------------------------------------------------------|
|      |    |        | <p>AGCATGAAGCTACGGACACAAATACCAGCAGAAATGCTTGCAACC<br/> ATTGACCTGAAATATTTCAACGAATCGACAAGAAAAGAAAATTGAG<br/> AAAATAAGGCCTCTCCTAATAGAAGGAACAGCCTCGTTGAGTCTT<br/> GGAATGATGATGGGCATGTTCAACATGCTGAGTACAGTCTTGGA<br/> GTATCAATTCTAAATCTTGGCCAAAAGAGGTACACAAAACCACA<br/> TACTGGTGGGACGGACTCCAATCCTCTGATGATTTCGCTCTCATAG<br/> TAAATGCACCGAATCATGAGGGAATACAGGCAGGAGTGGACAGGT<br/> TCTATAGGACTTGTAATTTGGTTGGGATCAATATGAGTAAAAAG<br/> AAATCCTATATAAATCGGACAGGAACATTTGAATTCACAAGCTTTT<br/> TCTACCGTTATGGGTTTGTAGCCAACCTCAGCATGGAGCTGCCAG<br/> CTTTGGAGTTTCTGGGATTAATGAATCGGCTGACATGAGCATTGGA<br/> GTTACAGTAATAAAGAATAACATGATAAACAACGATCTTGACCA<br/> GCAACAGCTCAAATGGCTCTTCAGCTATTTATCAAGGACTACAGAT<br/> ATACATATCGATGCCACAGGGGTGATACACAAATACAAACAAGGA<br/> GATCATTGAGCTAAAGAAGCTGTGGGAGCAGACCCGTTCAAAGG<br/> CAGGACTGTTGGTTTCAGATGGAGGCCAAAACCTTATAACAATATAC<br/> GGAATCTCCACATCCCAGAGGTCTGCTTGAAGTGGGAACACTGATGG<br/> ATGAAGATTACCAGGTAGACTTTGTAATCCCCTGAACCCCTTTGT<br/> CAGTCATAAGGAAATTGAATCCGTAACAATGCTGTAGTGATGCC<br/> AGCCCATGGTCCGGCCAAAAGCATGGAATATGATGCTGTTGCGAC<br/> CACACTCATGGGTCCCTAAGAGGAACCGTTCATTCTGAATACC<br/> AGTCAAAGAGGAATCCTTGAGGATGAACAGATGTATCAGAAGTGC<br/> TGCAATCTATTTGAAAAATTCTCCCTAGTAGCTCATAACAGGAGGC<br/> CAGTTGGAATCTCCAGTATGGTGGAGGCCATGGTGTCTAGGGCCC<br/> GAATTGATGCACGGATTGACTTCGAGTCTGGTAGGATTAAGAAGG<br/> AAGAGTTTGCTGAGATCATGAAGATCTGTTCCACCATTGAAGAGA<br/> TCAGACGGCAAAAACAGTGA</p>                                                                                                                  |
| UKDD | PA | 1-2151 | <p><b>ATGGAAGACTTTGTGCGACAATGCTTCAATCCAATGATCGTCGAG</b><br/> CTTGCGGAAAAGACAATGAAAGAATATGGGGAAAATCCAAAAT<br/> CGAAACGAACAAATTCGCTGCAATATGCACTCACTTAGAGGTCTG<br/> TTTCATGTATTCGGATTTCCACTTTATTGATGAACGAGGTAAATCA<br/> ATAATTGTAGAATCTGGCGATCCGAATGCATTATTGAAACACCGAT<br/> TTGAGATAAATTGAAGGGAGAGACCGAACGATGGCTTGGACAGTGG<br/> TAAATAGTATCTGCAACACCACAGGAGTCGATAAGCCTAAATTCC<br/> TCCCAGATTTGTATGATTACAAGGAGAACCGATTCAATTGAAATTGG<br/> AGTGACAAGGAGGGAAGTTCACACATACTACCTAGAAAAGGCAA<br/> ATAAGATAAAAATCAGAGAAGACACACATTACATATTCTCATTCA<br/> CTGGGGAGGAGATGGCCACCAAGCTGATTATATCCTTGATGAAG<br/> AGAGCAGAGCAAGGATCAAACCAGGTTGTTCACTATCAGGCAA<br/> GAAATGGCCAATAGGGGTCTGTGGGATTCTTTTCGTCAATCTGAGA<br/> GAGGCGAAGAGACAATTGAAGAAAGGTTTGAATCACAGGAACC<br/> ATGCGCAGGCTTGCCGACCAAGTCTCCACCGAATTTCTCCAGCC<br/> TTGAAAATTTAGAGCCTATGTGGATGGATTCAAACCGAACGGC<br/> TGCCCTGAGGGCAAGCTTTCTCAAATGTCAAAGAAGTGAACGCC<br/> AGAATTGAGCCATTGATGAAGACAACACCAGCCCTCTCAGATTA<br/> CCTGATGGTCTCTCTGCTCTCAGCGGTGCAAATTTACTGATGG<br/> ATGCCCTTAAATTGAGCATCGAAGACCAAGCCATGAGGGAGAAG<br/> GTATACCGCTATATGATGCAATCAAATGCATGAAGACGTTTTTTGG<br/> TTGGAAGAGCCCAACATTGTAACCACATGTAAGGACATAAA<br/> TCCCAACTATCTTGGCTTGGAAAGCAGGTGCTGGTAGAACTCCAA<br/> GACATTGAAAATGAAGAGAAAATCCCAAAAACAAAAACATGAA<br/> GAAAACAAGCCAACTAAAGTGGGCACTCGGTGAGAATATGGCACC<br/> TGAAAAGTGGACTTTGAGGACTGCAAAGATGTTAGCGATCTAAG<br/> ACAGTATGACAGTATGAACCAGAGCCCAGATCATTATCAAGCTG<br/> GATCCAGAGCGAATTCACAAAGCATGCGAATTGACAGATTGAG<br/> TTGGATTGAACTTGATGAAATAGGAGAAGATGTTGCTCCAATTGA</p> |

|      |    |        |                                                                                                                                                                                                                                                                                                                                                                                                                                                                                                                                                                                                                                                                                                                                                                                                                                                                                                                                                                                                                                                                                                                                                                                                                                                                                                                                                                                                                                                                                                                                                                                                                                                                                                                                                                                                                                                                                                                                                                          |
|------|----|--------|--------------------------------------------------------------------------------------------------------------------------------------------------------------------------------------------------------------------------------------------------------------------------------------------------------------------------------------------------------------------------------------------------------------------------------------------------------------------------------------------------------------------------------------------------------------------------------------------------------------------------------------------------------------------------------------------------------------------------------------------------------------------------------------------------------------------------------------------------------------------------------------------------------------------------------------------------------------------------------------------------------------------------------------------------------------------------------------------------------------------------------------------------------------------------------------------------------------------------------------------------------------------------------------------------------------------------------------------------------------------------------------------------------------------------------------------------------------------------------------------------------------------------------------------------------------------------------------------------------------------------------------------------------------------------------------------------------------------------------------------------------------------------------------------------------------------------------------------------------------------------------------------------------------------------------------------------------------------------|
|      |    |        | <p>GCACATTGCGAGTATGAGAAGAACTACTTCACAGCGGAAGTGTC<br/> TCATTGCAGGGCTACTGAATATATAATGAAAGGAGTTTATATAAAT<br/> ACAGCCCTGTTGAATTCATCCTGTGCAGCCATGGATGACTTCCAAT<br/> TGATTCCAATGATAAGCAAGTGCAGAACCAAAGAAGGAAGACGG<br/> AAGACAAATCTATATGGGTTTATTATAAAAGGAAGATCCCATTG<br/> AGGAATGATACCGATGTGGTAAATTTTGTGAGCATGGAGTTCTCTC<br/> TACTGACCCGAGGCTGGAACACACAAGTGGGAAAAGTACTGTG<br/> TTCTCGAAATAGGAGACATGCTCCTACGAACTGCAATAGGCCAAG<br/> TATCAAGACCCATGTTTCTTTATGTAAGGACCAATGGGACTTCCAA<br/> GATCAAGATGAAATGGGGCATGGAGATGAGGCGATGCCTTCTTCA<br/> ATCCCTCCAACAAATTGAGAGCATGATTGAGGCAGAGTCTTCTGTC<br/> AAAGAGAAGGACATGACCAAGGAATCTTTGAAAATAAATCAGAA<br/> ACGTGGCCAATTGGGGAATCACCTAAGGGGGTGGAGGAAAGCTCT<br/> ATTGGGAAAGTGTGTAGAACATTACTAGCAAAATCTGTATTCAAC<br/> AGCCTATATGCATCTCCACAACCTGAGGGGTTTCAGCTGAGTCGA<br/> GAAAGTTACTTCTCATTGTTTCAGGCATTTAGGGACAACCTGGAACC<br/> TGGGACCTTCGATCTTGGGGGGCTATATGAAGCAATTGAGGAGTG<br/> CCTGATTAATGATCCCTGGGTTTTGCTTAATGCATCTTGGTTCAACT<br/> CCTTCCTTACACATGCACTGAAATAG</p>                                                                                                                                                                                                                                                                                                                                                                                                                                                                                                                                                                                                                                                                                                                                                                                                                                                                                                                                                                               |
| UKDD | HA | 1-1704 | <p><b>ATGGAGAAAATAGTGCTTCTTCTTGCAGTGGTTAGCCTTGTTAAAA</b><br/> GTGATCAGATTTGCATTGGTTACCATGCAAACAACCTCAACAAAAC<br/> AGGTTGACACAATAATGGAAAAAACGTCCTGTTACACATGCC<br/> AAGACATACTGGAAAAGACACACAACGGGAAGCTCTGCGATCTTA<br/> ATGGAGTGAAGCCCCTGATTCTAAAGGATTGTAGCGTAGCTGGGT<br/> GGCTCCTTGAAAATCCAATGTGCGACGAGTTCATCAGGGTGCCGG<br/> AATGGTCTTACATCGTGGAGAGGGCTAACCCAGCCAACGACCTCT<br/> GTTACCCAGGGACCCTCAATGACTATGAGGAACTGAAACACCTAC<br/> TGAGCAGAATAAATCATTGAGAAAACCTCTGATCATCCCCAAGA<br/> GTTCTTGGCCCAATCATGAAACATCATTAGGGGTGAGCGCAGCAT<br/> GTCCATAACCAGGGAGCATCCTCATTGTTTCAGAAAATGTGGTATGGCT<br/> CATCAAAAAGAACGATGCATACCCGACAATAAAGATAAGCTACAA<br/> TAATACCAATCGGGAAGATCTTTTGATACTGTGGGGGATTCATCAT<br/> CCCAACAATGCAGAAGAGCAGACAAAATCTCTATAAAAACCCAGAC<br/> ACTTATGTTTCCGTTGGGACATCAACATTAACCAGAGATTGGTGC<br/> CAAAAATAGCTACTAGATCCCAAGTAAACGGGCAACGTGGAAGAA<br/> TGGATTTCTTCTGGACAATTTTAAAACCGAATGATGCAATCCACTT<br/> TGAGAGTAATGGAAATTTTATTGCTCCAGAATATGCCTACAAAATT<br/> GTCAAGAAAGGGGACTCAACAATTATGAAAAGTGAAGTGGAGTAT<br/> GGCTACTGCAACACCAAAATGTCAAACCCCAATAGGGGCGATAAAC<br/> TCTAGCATGCCATTCCACAATATACACCCTCTCACCATCGGGGAAT<br/> GCCCCAAATACGTGAAGTCAAACAAATTAGTCTTGCAGTGGGC<br/> TCAGAAAATAGTCTCTAAGGGAAAAGAAGAAGAAAAGAGGACTA<br/> TTTGGAGCTATAGCAGGGTTTATAGAGGGAGGATGGCAGGGGATG<br/> GTAGACGGTTGGTATGGGTACCACCATAGCAATGAGCAGGGGAGT<br/> GGGTACGCTGCAGACAAAGAATCCACCCAAAAGGCAGTAGATGG<br/> AGTTACCAATAAGGTCAACTCAATCATTGACAAAATGAACACTCA<br/> ATTTGAGGCCGTTGGAAGGGAATTTAATAACTTAGAAAAGGAGAAT<br/> AGAGAATTTAAACAAGAAAATGGAAGACGGATTCTTAGATGTCTG<br/> GACTTATAATGCTGAACTTTTAGTTCTCATGGAAAATGAGAGA<br/> CTAGATTTCCATGACTCAAATGTCAAGAACCTTTACGACAAAGTCC<br/> GACTACAGCTTAGGGATAATGCAAAGGAGCTGGGTAATGGTTGTT<br/> TCGAGTTCTATCACAATGTGATAACGAATGTATGGAAAGCGTAA<br/> GAAATGGGACGTATGACTACCCTAAGTATTCAGAAGAAGCAAGAT<br/> TAAAAGAGAAGAAATAAGCGGAGTGAATTAGAATCAATAGGA<br/> ACTTACCAATACTGTCAATTTATTCAACAGTGGCGAGTTCCCTAG<br/> CACTGGCAATCATAGTGGCTGGTCTATCTTTATGGATGTGCTCTAA</p> |

|      |    |        |                                                                                                                                                                                                                                                                                                                                                                                                                                                                                                                                                                                                                                                                                                                                                                                                                                                                                                                                                                                                                                                                                                                                                                                                                                                                                                                                                                                                                                                                                                                                                                                                                                                                                                                                                                                |
|------|----|--------|--------------------------------------------------------------------------------------------------------------------------------------------------------------------------------------------------------------------------------------------------------------------------------------------------------------------------------------------------------------------------------------------------------------------------------------------------------------------------------------------------------------------------------------------------------------------------------------------------------------------------------------------------------------------------------------------------------------------------------------------------------------------------------------------------------------------------------------------------------------------------------------------------------------------------------------------------------------------------------------------------------------------------------------------------------------------------------------------------------------------------------------------------------------------------------------------------------------------------------------------------------------------------------------------------------------------------------------------------------------------------------------------------------------------------------------------------------------------------------------------------------------------------------------------------------------------------------------------------------------------------------------------------------------------------------------------------------------------------------------------------------------------------------|
|      |    |        | TGGGTCGCTACAATGCAGAATTTGCATCTAA                                                                                                                                                                                                                                                                                                                                                                                                                                                                                                                                                                                                                                                                                                                                                                                                                                                                                                                                                                                                                                                                                                                                                                                                                                                                                                                                                                                                                                                                                                                                                                                                                                                                                                                                                |
| UKDD | NP | 1-1497 | <p> <b>ATGGCGTCTCAAGGCACCAACGATCTTATGAACAGATGGAAACT</b><br/> GGTGGAGAACGCCAGAATGCCACTGAAATCAGAGCATCTGTTGGA<br/> AGAATGGTTGGTGGAAATTGGAAGGTTTTATATACAGATGTGCACT<br/> GAACTCAAACCTCAGCAATTATGAGGGGAGACTGATCCAGAACAGC<br/> ATAACAATAGAAAGAATGGTTCTCTCTGCATTTGATGAAAGGAGG<br/> ACAAGTACCTGGAAGAACATCCCAGTGCGGGGAAGGACCCAAA<br/> GAAAACCTGGAGGTCCAATCTACAGAAGAAGAGACGGAAAGTGG<br/> TGAGGGAGCTGATTCTGTATGACAAAGAAGAGATCAGAAGGATCT<br/> GGCGTCAAGCAAATAATGGAGAAGATGCAACTGCTGGTCTCACCC<br/> ATCTGATGATCTGGCACTCCAACCTGAATGATGCCACATATCAGAG<br/> GACAAGGGCTCTCGTGCGCACTGGAATGGATCCCAGAATGTGCTC<br/> TCTGATGCAAGGATCAACTCTCCAAGAAGGTCTGGAGCTGCTGG<br/> TGCAGCAGTAAAAGGGGTTCGGAACAATGGTAATGGAATTGATTCC<br/> AATGATAAAGCGAGGGATTAATGATCGGAATTTCTGGAGAGGCCA<br/> AAATGGAAGAAGGACAAGGATTGCCTATGAGAGAATGTGCAACAT<br/> CCTCAAAGGGAAATTTCAAACAGCAGCACAAAGAAGCAATGATGGA<br/> TCAAGTGCAGAAAGCAGGAATCCTGGGAATGCTGAAATTGAAGA<br/> TCTCATTTTTCTGGCACGTTCTGCACTCATCCTGAGAGGATCAGTG<br/> GCCACAAGTCTTGTCTGCCTGCTTGTGTTTACGGACTTGCTGTGG<br/> CCAGTGGATATGACTTTGAGAGAGAAGGATACTCTCTGGTTGGA<br/> ATAGACCCTTTCCGTCTGCTTCAAACAGCCAAGTCTTCAGTCTCA<br/> TTAGACCAAATGAAAACCCAGCACATAAAAAGTCAGTTGGTATGGA<br/> TGGCATGCCATTCAGCAGCGTTTGAGGACCTGAGGGTATCAAGTTT<br/> CATCAGAGGGACAAGAGTGGTCCCAAGAGGACAACCTATCCACCAG<br/> AGGAGTTCAAATTGCATCAAATGAAAACATGGAAACAATGGACTC<br/> CAGCACTCTTGAATTGAGAAGCAGATACTGGGCTATAAGAACCAG<br/> GAGTGGAGGAAACACCAACCAACAGAGAGCTTCTGCAGGACAAA<br/> TCAGCGTACAACCCACCTTCTCAGTACAGAGAAATCTTCCCTTTGA<br/> AAGAGCGACCATCATGGCGGCATTTACAGGGAACACTGAAGGCAG<br/> GACCTCTGACATGAGGACTGAGATCATAAGAATGATGGAAAGTGC<br/> CAAACCAGAAGATGTGTCTTTCCAGGGGCGGGGAGTCTTCGAGCT<br/> CTCGGACGAAAAGGCAACGAACCCGATCGTGCCTTCCCTTGAC<br/> ATGAGCAACGAAGGATCTTATTTCTTCGGAGACAGTGCAGAGGAG<br/> TATGACAATTA </p> |
| UKDD | NA | 4-1420 | <p> AATCCAAATCAGAAAATAGTAACCATTGGCTCCATTTCAATTAGGGT<br/> TGGTTGTATTCAATGTTCTACTGCATGCTGTGAGCATCATATTAAC<br/> AGTGTTAGCCCTGGGGAAGAGTGAAAACAATGGAATCTGCAATGG<br/> AACTGTAGTGAGGGAATACAATGAAACAGTTAGAATAGAGAAA<br/> GTGACTCAATGGTACAATACTAGCGTAGTCGAATATGTACCGCATT<br/> GGAATGAGGGCACTTATATAAATAACACCGAACCAATATGTGATG<br/> TCAAGGGCTTTGCACCTTTTTCCAAGGACAATGGGATAAAGAGTTGG<br/> CTCCAGGGGACATATTTTTGTCATAAAGAGAGCCTTTCGTCTCTTGT<br/> TCACCTGTAGAGTGCAGGACTTTCTTCTCACTCAGGGATCTCTAC<br/> TCAATGACAAACACTCAAATGGAACAGTGAAGGATAGAAGCCCAT<br/> TCAGAACTCTCATGAGTGTGCGAAGTGGGCCAACCCAGTGTAT<br/> ATCAAGCCAGGTTTGAAGCTGTGGCATGGTCAGCAACAGCCTGTC<br/> ATGATGGTAATAAGTGGATGACGATTGGTGTAACAGGGCCAGATT<br/> CTAAAGCAGTAGCAGTAGTTCATTACGGAGGGGTGCCTACTGACG<br/> TTGTAACTCCTGGGCAGGAGATATATTAAGAACTCAGGAGTCATC<br/> TTGTACTTGCATTCAAGGTAATTGTTATTGGGTAATGACTGACGGT<br/> CCTGCCAATAGACAGGCGCAGTATAGAATATACAAAGCAAATCAA<br/> GGCAAATAAATTGGCCGAACAGATGTTAGCTTTAGTGGAGGACAT<br/> ATTGAGGAATGTTCTTGTATCCAATGATGGTAAAGTGGAAATGCG<br/> TGTGTAGAGACAACCTGGACGGGAACAAAGGCCTGTACTAATTA<br/> TTTCGCCTGATCTCTTACAGGGTTGGGTATTTATGTGCAGGGTT </p>                                                                                                                                                                                                                                                                                                                                                                                                                                                                                                                                                                                                                                                          |

|      |    |        |                                                                                                                                                                                                                                                                                                                                                                                                                                                                                                                                                                                                                                                                                                                                                                                                                                                                                                                                                                                                                                                                                                              |
|------|----|--------|--------------------------------------------------------------------------------------------------------------------------------------------------------------------------------------------------------------------------------------------------------------------------------------------------------------------------------------------------------------------------------------------------------------------------------------------------------------------------------------------------------------------------------------------------------------------------------------------------------------------------------------------------------------------------------------------------------------------------------------------------------------------------------------------------------------------------------------------------------------------------------------------------------------------------------------------------------------------------------------------------------------------------------------------------------------------------------------------------------------|
|      |    |        | GCCAGTGACTCCAAGAGGGGAAGATACTCAATTTGTCGGTTC<br>ATGCACTAGTCCCATGGGAAATCAGGGATATGGCGTAAAAGGGTT<br>CGGGTTTCGACAGGGAACACTGATGTGTGGGTGGGGCGGACAATTAG<br>TCGAACCTCCAGATCAGGATTTGAAATAATAAGGATAAAGAATGG<br>TTGGACGCAAACAAGCAAAGAACAGATTAGAAGACAGGTGGTTGT<br>TGATAACTCGAATTGGTTCGGGATACAGTGGGTCTTTCACCTTACCA<br>GTAGAATTGCTGGGAGGGAATGTTTGGTTCCTGTTTTTGGGTCG<br>AAATGATCAGAGGTAGGCCAGAAGAGAGAACAATCTGGACCTCTA<br>GTAGCTCCATTGTAATGTGTGGAGTTGATTATGAAATTGCCGATTG<br>GTCATGGCACGATGGAGCTATTCTTCCCTTTGACATCGATAAGACG<br>TAATTTACGA                                                                                                                                                                                                                                                                                                                                                                                                                                                                                                                                                                                       |
| UKDD | MP | -5-982 | GAAAGATGAGTCTTCTAACCGAGGTGCAAACGTACGTTCTCTCTAT<br>CATCCCGTCAGGCCCCCTCAAAGCCGAGATCGCGCAGAGACTTGA<br>AGATGTCTTTGCAGGGAAAAACACCGATCTCGAGGCTCTCATGGA<br>GTGGCTAAAGACAAGACCAATCCTGTACCTCTGACTAAAGGGAT<br>TTTGGGATTTGTGTTACGCTCACCGTGCCAGTGAGCGAGGACTG<br>CAGCGTAGACGCTTCGTCCAGAATGCCCTAAATGGGAACGGGGAT<br>CCAAATAATATGGATAAGGCAGTTAAGCTATATAAGAAGCTGAAA<br>AGAGAGATAACATTCCATGGGGCTAAGGAGGTTCGCACTTAGCTAC<br>TCAACCGGTGCACCTGCCAGCTGCATGGGTCTCATATACAACAGG<br>ATGGGAACGGTGACTACAGAAGTGGCTTTTTGGCCTAGTGTGTGCC<br>ACTTGTGAGCAGATTGCAGATTCACAGCATCGGTCCCACAGACAG<br>ATGGCAACCATACCAACCCATTAATCAGACATGAGAACAGAATG<br>GTGCTGGCCAGCACTACAGCTAAGGCCATGGAGCAGATGGCAGGA<br>TCAAGCGAGCAGGCATCAGAAGCCATGGAGGTTGCTAATCAGGCC<br>AGGCAGATGGTACAGGCAATGAGGACAATTGGGACTCATCCTAAC<br>TCTAGTGCTGGTCTGAGAGATAATCTTCTTGAAAATTTGCAGGCCT<br>ACCAGAACCGAATGGGAGTGCAGATGCAGCGATTCAAGTGATCCT<br>CTTGTGTTGCCGCAAATATCATTGGGATCCTGCACTTGATATTGT<br>GGATCCTTGATCGTCTTTTCTTCAAATGCATTTATCGTCGCCTTAAA<br>TACGGTTTGAAAATAGGGCCTTCTACGGAAGGGGTACCTGAGTCT<br>ATGAGGGAAGAGTACCGGCAGGAACAGCAGAGTGCTGTGGATGTT<br>GACGATGGTCATTTTGTCAACATAGAATTGGAGTAA |
| UKDD | NS | -5-849 | ACATAATGGACTCCAACACTGTGTCAAGCTTTCAGGTAGACTGCTT<br>TCTTTGGCATGTCCGCAAACGATTTGCAGACCAAGAAGTGGGTGAT<br>GCCCCATTCTTGACCGGCTTCGCCGAGACCAGAAGTCCCTAAGA<br>GGAAGAGGCAGCACTCTTGGTCTGGACATCGAGACAGCTACTCGT<br>GCGGGAAGCAAATATTGGAGCGGATTCTGGGGGAAGAATCTGAT<br>GAAACACTTAAAATGAATATTGCTTCTGTACCGACTTCACGCTACC<br>TAACTGACATGACTCTTGAAGAAATGTCAAGAGACTGGTTCATGCT<br>CATGCCCAAGCAGAAAGTAGCAGGTTCTCTCTGCATCAAAAATGGA<br>CCAGGCAATAATGGATAAAAACCATCATACTGAAAGCAAACCTCAG<br>TGTGATTTTTGATCGGCTGGAAACCCTAATATTACTTAGAGCTTTC<br>ACAGAAGAAGGAGCAATTGTGGGAGAAATCTCACCATTACCTTCT<br>CTTCCAGGACATACTGATGAGGATGTCAAATGCAATTGGGGTC<br>CTCATCGGAGGGCTTGAATGGAATGATAACACAGTTTCGAGTCTCT<br>GAACTCTACAGAGATTCACCTGGAGAAGCAGTAATGAGGATGGG<br>AGACCTTCACTCCCTTCAAACAGAAACGGAAAATGGCGAGAACA<br>ATTGAGTCAGAAGTTCGAGGAAATAAGATGGCTGATTGAGGAAAT<br>GCGACATAGATTGAAGATCACAGAGAACAGCTTCGAACAAATAAC<br>GTTTATGCAAGCTTTACAACCTATTGCTTGAAGTGGAGCAAGAGATA<br>AGAACCTTCTCGTTTCAGCTTATTTAATGATAA                                                                                                                                                      |
