# Supplementary material for: Comparison of sequencing methods and data processing pipelines for whole genome sequencing and minority single nucleotide variant (mSNV) analysis during an influenza A/H5N8 outbreak
Source: PubMed Central journal article supplement (PMC7032710; doi:10.1371/journal.pone.0229326), 2020-02-20
Supplement: pone.0229326.s003.pdf [file pone.0229326.s003.pdf]

| <b>Sample</b> | <b>SP</b> | <b>Platform</b> | <b>Method</b> | <b>Reads</b> | <b>Nucleotides</b> | <b>Influenza reads</b> | <b>Influenza Nucleotides</b> |
|---------------|-----------|-----------------|---------------|--------------|--------------------|------------------------|------------------------------|
| <b>DETU</b>   | 1         | Illumina MiSeq  | RNA-Seq+PCR   | 35,397,942   | 4,768,436,983      | ca. 21,238,765         | ca 2,861,062,190             |
|               | 3         | 454             | Amplicon      | 78,028       | 25,829,288         | 75,913                 | 25,692,541                   |
|               | 2         | Illumina MiSeq  | RNA Shot gun  | 1,394,424    | 417,805,080        | 1,062,401              | 318,461,282                  |
| <b>NLCH</b>   | 1         | Illumina MiSeq  | RNA-Seq+PCR   | 45,091,902   | 6,487,449,580      | 1,454,528              | 203,647,299                  |
|               | 3         | 454             | Amplicon      | 32,661       | 12,458,090         | 32,661                 | 12,458,090                   |
|               | 2         | Illumina MiSeq  | RNA Shot gun  | 1,148,978    | 344,137,436        | 373,742                | 112,011,370                  |
| <b>UKDD</b>   | 1         | Illumina MiSeq  | RNA-Seq+PCR   | 10,214,524   | 768,562,277        | 867,355                | 64,794,700                   |
|               | 3         | 454             | Amplicon      | 49,993       | 18,897,160         | 48,769                 | 18,821,757                   |
|               | 2         | Illumina MiSeq  | RNA Shot gun  | 1,512,512    | 421,870,650        | 1,039,962              | 294,863,446                  |
